1 Abundant small RNAs in the reproductive tissues of the honey bee, *Apis mellifera*, are a plausible  
2 mechanism for epigenetic inheritance and parental manipulation of gene expression

3

4 Owen T. Watson<sup>1</sup>, Gabriele Buchmann<sup>2</sup>, Paul Young<sup>3</sup>, Kitty Lo<sup>4</sup>, Emily J. Remnant<sup>2</sup>, Boris Yagound<sup>2</sup>,  
5 Mitch Shambrook<sup>5</sup>, Andrew F. Hill<sup>5</sup>, Benjamin P. Oldroyd<sup>\*2,6</sup>, Alyson Ashe<sup>\*1</sup>

6

7 \* Corresponding authors

8 <sup>1</sup>School of Life and Environmental Sciences, The University of Sydney, Sydney, NSW 2006, Australia

9 <sup>2</sup>BEE Laboratory, School of Life and Environmental Sciences, University of Sydney, Sydney, NSW

10 2006, Australia.

11 <sup>3</sup>Molecular Cardiology and Biophysics Division, Victor Chang Cardiac Research Institute NSW 2010,

12 Australia.

13 <sup>4</sup> School of Mathematics and Statistics, The University of Sydney, Sydney, NSW 2006, Australia.

14 <sup>5</sup>Department of Biochemistry & Genetics, La Trobe Institute for Molecular Science, La Trobe

15 University, Bundoora, Victoria 3086, Australia

16 <sup>6</sup>Wissenschaftskolleg zu Berlin, Wallotstrasse 19, 14193 Berlin, Germany.

17

18 Running title: Small RNAs in reproductive tissues of honey bees

## 19 **Abstract**

20 Polyandrous social insects such as the honey bee are prime candidates for parental manipulation of  
21 gene expression in offspring. Although there is good evidence for parent-of-origin effects in honey  
22 bees the epigenetic mechanisms that underlie these effects remain a mystery. Small RNA molecules  
23 such as miRNAs, piRNAs and siRNAs play important roles in transgenerational epigenetic inheritance  
24 and in the regulation of gene expression during development. Here we present the first  
25 characterisation of small RNAs present in honey bee reproductive tissues: ovaries, spermatheca,  
26 semen, fertilised and unfertilised eggs, and testes. We show that semen contains fewer piRNAs  
27 relative to eggs and ovaries, and that piRNAs and miRNAs which map antisense to genes involved in  
28 DNA regulation and developmental processes are differentially expressed between tissues. tRNA  
29 fragments are highly abundant in semen and have a similar profile to those seen in semen in other  
30 animals. Intriguingly we find abundant piRNAs that target the sex determination locus, suggesting  
31 that piRNAs may play a role in honey bee sex determination. We conclude that small RNAs play a  
32 fundamental role in honey bee gametogenesis and reproduction and provide a plausible mechanism  
33 for parent-of origin-effects on gene expression and reproductive physiology.

34

## 35 **Introduction**

36 Parents can influence the phenotype of their offspring not only through the genetic contribution  
37 that they pass on but also through so-called 'parental effects'. Maternal effects, the best-studied  
38 parental effect, occur when the mother influences the phenotype of the offspring, regardless of the  
39 offspring's own genotype. For example, strong maternal effects can be caused by maternal  
40 deposition into oocytes of proteins or messenger RNAs (mRNAs) that are critical for early  
41 development of the zygote. If the mother is unable to provide these critical proteins/mRNAs, the  
42 resultant embryo dies regardless of its genotype. Maternal effects have been recognised by  
43 biologists for many decades whereas paternal effects are less well studied, partially due to the  
44 relatively small size of sperm and the commonly held belief that sperm contribute only their DNA to  
45 the fertilised egg. However, it is increasingly clear that paternal effects exist, although the  
46 mechanisms by which they are mediated is often unclear (Crean and Bonduriansky 2014).

47 Honey bees are a species in which parental manipulation of gene expression (such as via parental  
48 effects) is likely to evolve because i) females are polyandrous (mate with many males), ii) there is  
49 large investment in offspring colonies, the costs of which are borne by the parent colony collectively,  
50 but the majority of benefits accrue to a tiny number of offspring queens and their parents, iii) the

51 value of male and female offspring to parents differs strongly (Haig 1999, 2000; Queller 2003; BURT  
52 and Trivers 2006; Haig 2010). Parental manipulation of offspring gene expression is particularly  
53 relevant for fathers, who die after mating (Winston 1987), and are therefore unable to directly  
54 enhance the reproductive success of their daughters. Indeed, a drone's only opportunity to enhance  
55 the reproductive outcomes of his daughters is to use epigenetic manipulations that provide his  
56 daughters with an advantage over the daughters of other males (Haig 1992; Queller 2003; Drewell et  
57 al. 2012; Pegoraro et al. 2017). For example, a male might attempt to minimise additional matings by  
58 the queen that he has just mated with, potentially increasing the reproductive success of his own  
59 daughters (Liberti et al. 2019). Further, it has been repeatedly shown that larvae reared as queens  
60 comprise a non-random set of patrines, suggesting that some males enhance the probability that  
61 their daughters will be reared as reproductive queens, potentially by epigenetic means (Osborne and  
62 Oldroyd 1999; Châline et al. 2002; Withrow and Tarpay 2018).

63 Small RNAs refer to non-coding RNA molecules between 18 and 50 nt long. Multiple classes of small  
64 RNAs are abundant in the semen of many animals and can alter offspring phenotypes when injected  
65 into zygotes (Vogel et al. 2010; Rassoulzadegan et al. 2006; Gapp et al. 2014; Grandjean et al. 2015;  
66 Benito et al. 2018; Rodgers et al. 2015; Chen et al. 2016a). Small RNAs are deposited maternally in  
67 *Drosophila melanogaster* (Brennecke et al. 2008; Akkouche et al. 2013) and recent evidence suggests  
68 that small RNAs are also deposited paternally and can influence gene expression in the next  
69 generation (Lempradl et al. 2021). Two examples demonstrate that biologically active small RNAs  
70 can be transferred from hymenopteran parents to offspring or from workers to larvae, providing a  
71 plausible mechanism by which epigenetic information could be transmitted between generations in  
72 honey bees. First, biologically active dsRNAs that confer acquired immunity are shared between  
73 honey bee generations via the glandular secretions that workers feed to larvae (Maori et al. 2019).  
74 Second, female jewel wasps (*Nasonia vitripennis* - of the same taxonomic order as honey bees)  
75 include RNA molecules in their eggs that determine the sex of their offspring (Verhulst et al. 2010).

76 Small RNAs are classified according to their size and function. The first-discovered small RNA  
77 molecules, collectively known as microRNAs (miRNAs), are short (c.a. 22 nt) non-coding RNAs that  
78 typically bind to the 3' UTR region of messenger RNAs, causing translational inhibition and/or mRNA  
79 degradation (Cannell et al. 2008; Gebert and MacRae 2019). Maternally inherited miRNAs are  
80 involved in sex determination during embryogenesis in *Caenorhabditis elegans* (McJunkin 2018) and  
81 in mouse sperm, miRNAs degrade maternal mRNA stores in early zygotes to reprogram gene  
82 expression in the offspring (Rodgers et al. 2015). Some miRNAs are maternally deposited in *D.*

83 *melanogaster*, where they play important roles in embryogenesis (Soni et al. 2013; Lee et al. 2014;  
84 Kugler et al. 2013a).

85 Piwi interacting RNAs (piRNAs) are a class of small RNA between 24-32 nt in size, that typically have  
86 a uridine at the 5' end (5'U bias) (Gunawardane et al. 2007). piRNAs interact with PIWI proteins, a  
87 class of Argonaute protein, to repress transposable element (TE) activity in the germline of animals  
88 during meiosis (Girard et al. 2006), including in insects (Anand and Kai 2012; Brennecke et al. 2007).  
89 Additionally, piRNAs are involved in regulating gene expression in developing sperm cells and in  
90 somatic cells (Czech and Hannon 2016; Thomson and Lin 2009; Weick and Miska 2014). In *Drosophila*  
91 embryonic somatic cells, piRNAs destabilise/cleave target mRNAs to regulate embryonic  
92 development (Dufourt et al. 2017). In *Drosophila* germ cells piRNAs interact with Aubergine and a  
93 germline specific poly(A) polymerase to facilitate the localisation of essential germline mRNAs to the  
94 germ plasm, where they are protected and can be passed from generation to generation (Dufourt et  
95 al. 2017). Aubergine-piRNA-mediated epigenetic silencing of protein coding genes is well  
96 characterised in *D. melanogaster*, and can occur through piRNA induced silencing complexes (Rouget  
97 et al. 2010; Barckmann et al. 2015; Wang and Lin 2021) and/or spreading of piRNA-mediated  
98 heterochromatin into neighbouring loci (Lee 2015).

99 tRNA fragments (tRFs) are small RNA molecules that are derived from the cleavage of mature  
100 transfer RNAs (tRNAs) (Keam and Hutvagner 2015). The function of tRFs is mostly an enigma: some  
101 tRFs act similarly to miRNAs (Haussecker et al. 2010), while others interfere with global protein  
102 translation at the ribosome (Ivanov et al. 2011; Kim et al. 2017). Like miRNAs, tRF expression in  
103 *Drosophila* is age dependent. tRFs contain a seed region that has complementarity to 3'UTR regions  
104 of messenger RNAs and they interact with Argonaute proteins, suggesting that they form post-  
105 transcriptional RNA-induced silencing complexes (RISC) (Karaiskos et al. 2015) and/or are involved in  
106 influencing mRNA stability and transport (Göktaş et al. 2017). In mammalian sperm there is a global  
107 loss of piRNAs and an increase in tRFs and miRNAs that occurs during transit through the epididymis,  
108 a process that is essential for sperm maturation. tRFs have also been implicated in paternal  
109 transgenerational epigenetic inheritance (Sharma et al. 2016; Chen et al. 2016b; Cropley et al. 2016).

110 The central roles played by miRNAs, piRNAs and tRFs in spermatogenesis, nurturing of germ line  
111 cells, somatic gene regulation and epigenetic inheritance in other species make them prime  
112 mechanistic candidates for parental manipulation of offspring development in honey bees (He et al.  
113 2009; Thomson and Lin 2009). Previous studies of small RNAs in *A. mellifera* have primarily focussed  
114 on ovary, embryo and thorax tissues to investigate caste determination, oviposition or phylogenetic  
115 similarities (Lewis et al. 2018; Pires et al. 2016; Chen et al. 2017; Wang et al. 2017). Here, we focus

116 on small RNAs in reproductive tissues to investigate their potential roles in gametogenesis, parent-  
117 of-origin effects and epigenetic inheritance. We find that honey bee reproductive tissues have  
118 distinctive small RNA profiles, with ovaries and eggs having a higher proportion of piRNAs relative to  
119 other tissues, semen having a higher proportion of tRNA fragments, and spermatheca and testes  
120 having a higher proportion of miRNAs. Our miRNA and piRNA target prediction suggests that germ  
121 cells utilise small RNAs to regulate processes during development (post-fertilisation), and in  
122 gametogenesis and sex determination. Our findings place small RNAs front and centre as the  
123 mechanism that mediates the parent- of-origin effects that are phenotypically observed in honey  
124 bees, but which cannot be ascribed to other epigenetic mechanisms, notably DNA methylation  
125 (Remnant et al. 2016; Guzman-Novoa et al. 2005; Wu et al. 2020; Galbraith et al. 2016; Kocher et al.  
126 2015; Oldroyd and Yagound 2021).

## 127 **Results**

### 128 **Length distribution and biotype analysis of small RNAs**

129 We surveyed the small RNA populations in the reproductive and germline tissues of Australian  
130 commercial honey bees (mainly *A. m. ligustica* heritage). We extracted RNA and generated small  
131 RNA libraries from a range of male (testes and semen) and female (spermatheca and ovary)  
132 reproductive tissues, as well as eggs from mated and virgin queens. The spermatheca is the organ in  
133 which sperm are stored, which a queen uses to fertilise female-destined eggs throughout her life.  
134 Sequencing of these libraries generated 12 to 35 Mb of reads per sample. On average 65% of reads  
135 mapped to the *A. mellifera* 4.5 genome. We first classified the small RNAs by size and biotype.  
136 Strikingly, the RNA populations varied greatly in size and biotype depending on their tissue of origin  
137 (Figure 1A, Supplemental Figure 1).

138 Mapped reads from spermatheca and testis samples had a prominent peak at 21-23 nt which is the  
139 expected size of miRNAs. 58% and 82% respectively mapped to known precursor miRNAs from  
140 miRbase (Figure 1A). In addition to honey bee miRNAs contained in miRbase, we identified 301 novel  
141 miRNAs using miRDeep2 (Friedländer et al. 2012). The majority of these novel miRNAs were  
142 identified in the testes and spermathecal libraries (Figure 1B) (Supplemental Figure 1B,  
143 Supplemental Table S1). StemLoop qPCR (Hurley et al. 2011) was conducted to validate three of the  
144 novel miRNAs that were differentially expressed between tissue types, according to small RNA  
145 sequencing. In all three cases the StemLoop qPCR results mirrored the expression levels suggested  
146 by the small RNA sequencing (Supplemental Figure 1C).

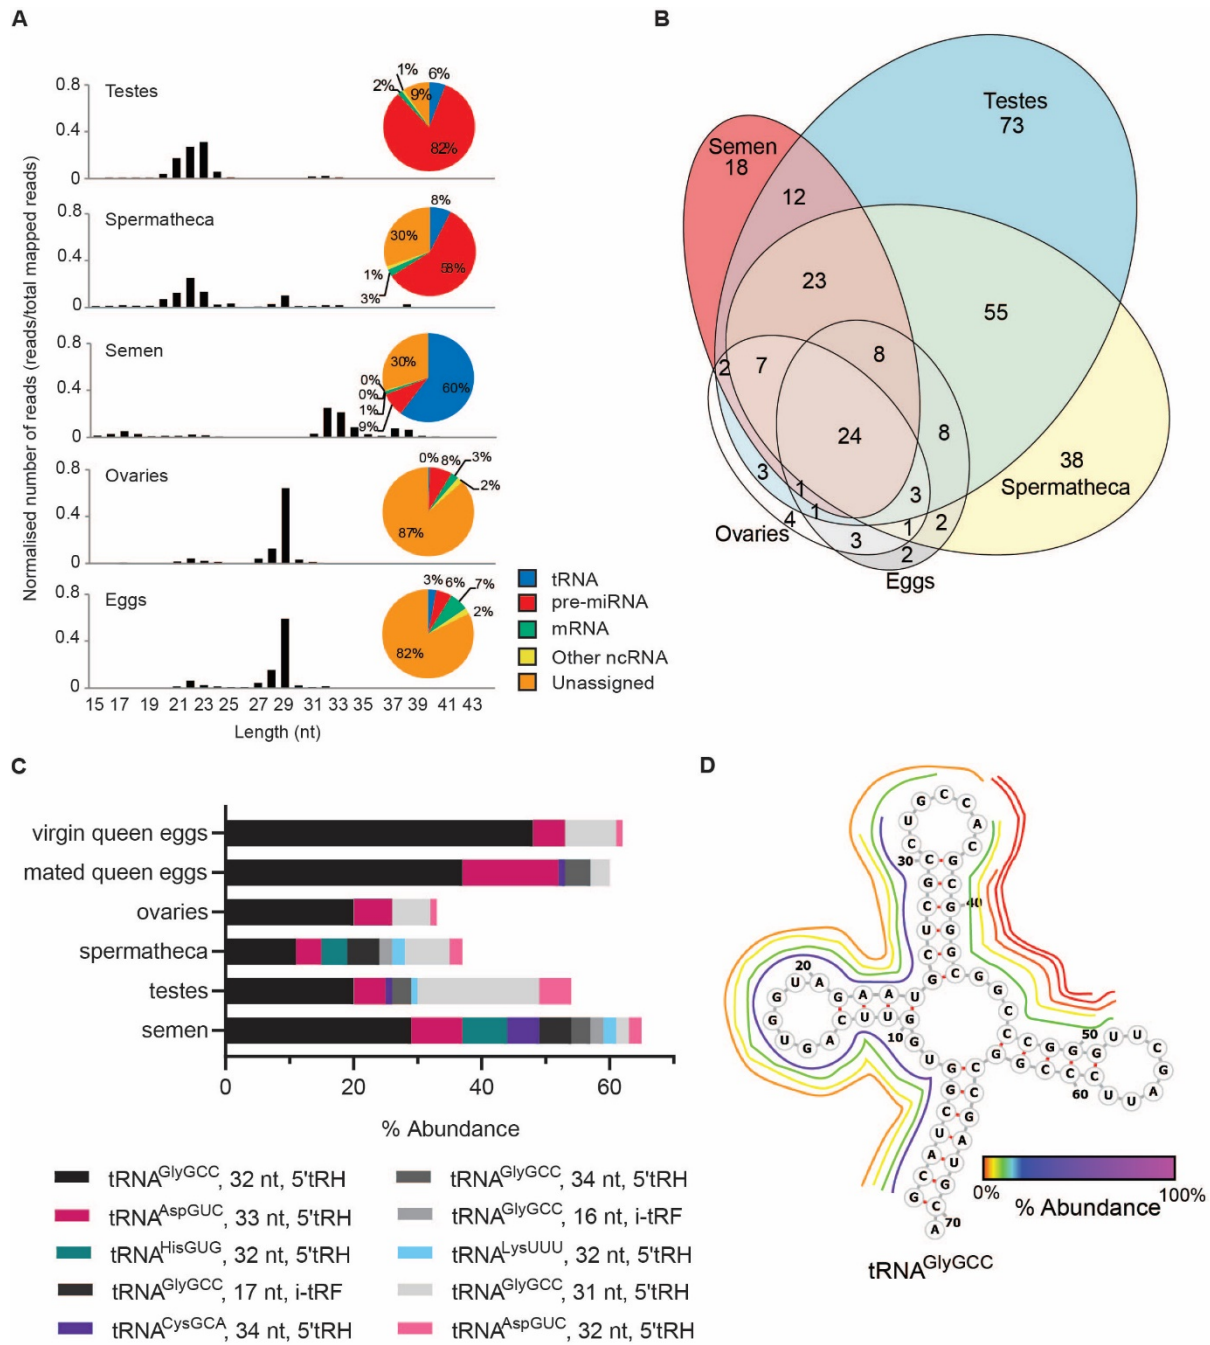

147

148 **Figure 1. Small RNA species in the reproductive tissues of the honey bee.** **A.** Size distribution of  
 149 small RNAs between 13 and 43 nt in length mapped to the Amel 4.5 honey bee genome. Pie charts  
 150 show the proportion of mapped reads that align to annotations of each biotype (tRNA, pre-miRNA,  
 151 mRNA, other ncRNA and unannotated) for each tissue type. **B.** Euler plot illustrating number of novel  
 152 miRNAs discovered in each reproductive tissue type and the overlap between tissue types. **C.** The 10  
 153 most abundant tRFs in semen and their relative abundance in other tissue types. tRF isoforms that  
 154 originate from the same tRNA are shown as different shades of the same colour. **D.** A representation  
 155 of the abundance of tRNA fragments derived from the tRNA<sup>GlyGCC</sup> in semen. The origin of each tRF is  
 156 shown by its position around the molecule and relative abundance is indicated by colour.  
 157



158 In contrast to all other samples, semen samples had an abundance of mapped reads in the 32-33 nt  
159 range. Biotype analysis revealed that 60% of these reads mapped to sub-regions of tRNAs and were  
160 therefore tRNA fragments (tRFs) (Figure 1A). Following the classifications of Loher and colleagues  
161 (Loher et al. 2017), tRFs were classified as being either 5' or 3' tRNA halves (tRH), 5' or 3' tRFs or  
162 internal tRFs (itRFs). Figure 1C shows the top 10 tRFs in semen, and their proportional abundance in  
163 other tissues. A full list of the relative abundance of tRFs across all tissue types is provided in  
164 Supplemental Table S2. The levels of individual tRFs appear to be highly regulated because their  
165 abundance differed greatly among tissues. For example, although the most abundant isodecoder,  
166 tRNA<sup>GlyGCC</sup>, generated 30-60% of all tRFs per tissue type, the first and second most abundant  
167 tRNA<sup>GlyGCC</sup> itRFs in semen were present at much higher levels in semen and spermatheca than in all  
168 other tissues (Figure 1C). This difference indicates that tRF production is tissue-specific, and not  
169 simply a consequence of tRNA degradation. Strikingly, the high abundance of tRFs in semen was not  
170 observed in the spermatheca (Figure 1A). This suggests that tRFs present in semen are carried in the  
171 seminal fluid and not by the spermatozoa, and/or that female contribution of small RNAs to the  
172 spermathecal fluid is abundant.

173 Mapped reads from egg and ovary samples showed a peak at 29 nt. This peak was also evident in the  
174 spermathecal samples but was relatively smaller than the larger peak at 21-23 nt (Figure 1A). The  
175 high abundance of 29nt length reads was evident in both mapped and unmapped reads  
176 (Supplemental Figure 1B), suggesting that many were from repetitive regions that were not placed in  
177 the Amel 4.5 genome assembly. Egg and ovary samples also had a large proportion of total reads  
178 (~85%) that did not map to any recognised category of small RNA. The 29 nt reads are within the size  
179 range of piRNAs and nucleotide frequency plots generated using 26-31 nt reads showed a strong  
180 bias towards 1U in ovaries and eggs (Supplemental Figure 2). We therefore hypothesised that these  
181 29 nt small RNAs were piRNAs. To generate a list of putative piRNAs for each tissue, reads mapping  
182 to other known ncRNAs (i.e. tRNAs, rRNAs, miRNAs) and reads below 26nt or above 31nt were  
183 removed.

#### 184 piRNA cluster analysis

185 piRNAs are often transcribed from pericentromeric and telomeric heterochromatic regions, termed  
186 piRNA clusters, that are characterized by an abundance of transposable element (TE) remnants  
187 (Andersen et al. 2017). Using three algorithms: a custom script (CREST), proTRAC v2.4.2, and piClust,  
188 we identified 199 putative honey bee piRNA clusters totaling 3,113.3 kB (1.25% of the genome)  
189 (Supplemental Table S3). Of the 199 clusters, 113 (57%) were located on unmapped scaffolds,  
190 probably due to the association with repetitive sequences that are hard to map (Huang et al. 2017).

191 In contrast to *D. melanogaster* (Czech and Hannon 2016; Akkouche et al. 2017), we found that most  
192 honey bee piRNA clusters (171 of 199) are uni-directional and equally present on both genomic  
193 strands (Supplemental Table S3). This supports the suggestion of Wang et al that species other than  
194 *Drosophilids* are incapable of dual-stranded piRNA cluster activity (Wang et al. 2017).

195 Clusters ranged in size from 1kB (Cluster 28) to 152 kB (Cluster 98) (Supplemental Table S3). Of the  
196 199 clusters, 69 were identified in only one tissue, whereas only eight clusters were identified in all  
197 five tissues (Figure 2A), demonstrating strong tissue-specific regulation of piRNA expression. The vast  
198 majority of putative piRNA reads mapped to clusters for ovaries (99%), eggs (99%), and spermatheca  
199 (90%). In contrast, only 56% of putative piRNAs mapped to clusters for testes and 23% for semen,  
200 suggesting that many of the piRNA-sized reads in these two tissues were not *bona fide* piRNAs, or  
201 are produced non-canonically. Of the piRNA reads that mapped to clusters, over 50% mapped to  
202 cluster 83 in eggs, ovaries and spermatheca (Figure 2B). Cluster 83 contains many transposable  
203 element remnants (Figure 2C) (predominantly large retrotransposon derivatives (LARDs)) and is the  
204 main piRNA-generating cluster in female tissues. This shows that honey bee piRNA clusters, like  
205 those in *Drosophila* (Brennecke et al. 2007), resemble transposon graveyards. In semen, 75% of  
206 clustered piRNA reads map to cluster 8, which contains one large peak of reads but does not overlap  
207 any TE or other genomic feature. This again suggests that TEs are not associated with piRNA-sized  
208 reads in semen.

209 Previous analysis of whole tissue honey bee larvae suggested that honey bees utilise ping pong  
210 biogenesis in the production of piRNAs (Wang et al. 2017). To determine if this holds true for  
211 reproductive tissues, we assessed two signatures of ping pong biogenesis (Czech and Hannon 2016):  
212 the prevalence of a 1U/10A nucleotide bias and complementary sequence overlaps spanning 10 bp.  
213 Nucleotide frequency analysis of clustered piRNAs (in contrast to all piRNA-length reads) showed a  
214 strong 1U bias in all tissues but no strong 10A bias (Figure 2D), indicating that primary piRNAs are  
215 the most common overall. However, when 1U/10A ratios were plotted for each individual cluster it  
216 was apparent that some clusters had both a 1U and 10A bias, and that the extent of this bias  
217 differed between tissues (Figure 2D). Furthermore, a 10 bp overlap between reads was enriched in  
218 testes and spermatheca, present in ovaries and eggs, but conspicuously absent in semen  
219 (Supplemental Figure 3A). This suggests that some ping pong cycling is present in tissues except  
220 semen. We also measured piRNA phasing by plotting the 3'-5' end distances between adjacent  
221 piRNAs. In *D. melanogaster* primary piRNA biogenesis PIWI proteins use piRNAs as guides to  
222 fragment a pre-piRNA into a string of tail-to-head phased pre-piRNAs that are further processed into  
223 mature piRNAs (Gainetdinov et al. 2018). We detected a significant signature of phased piRNA in



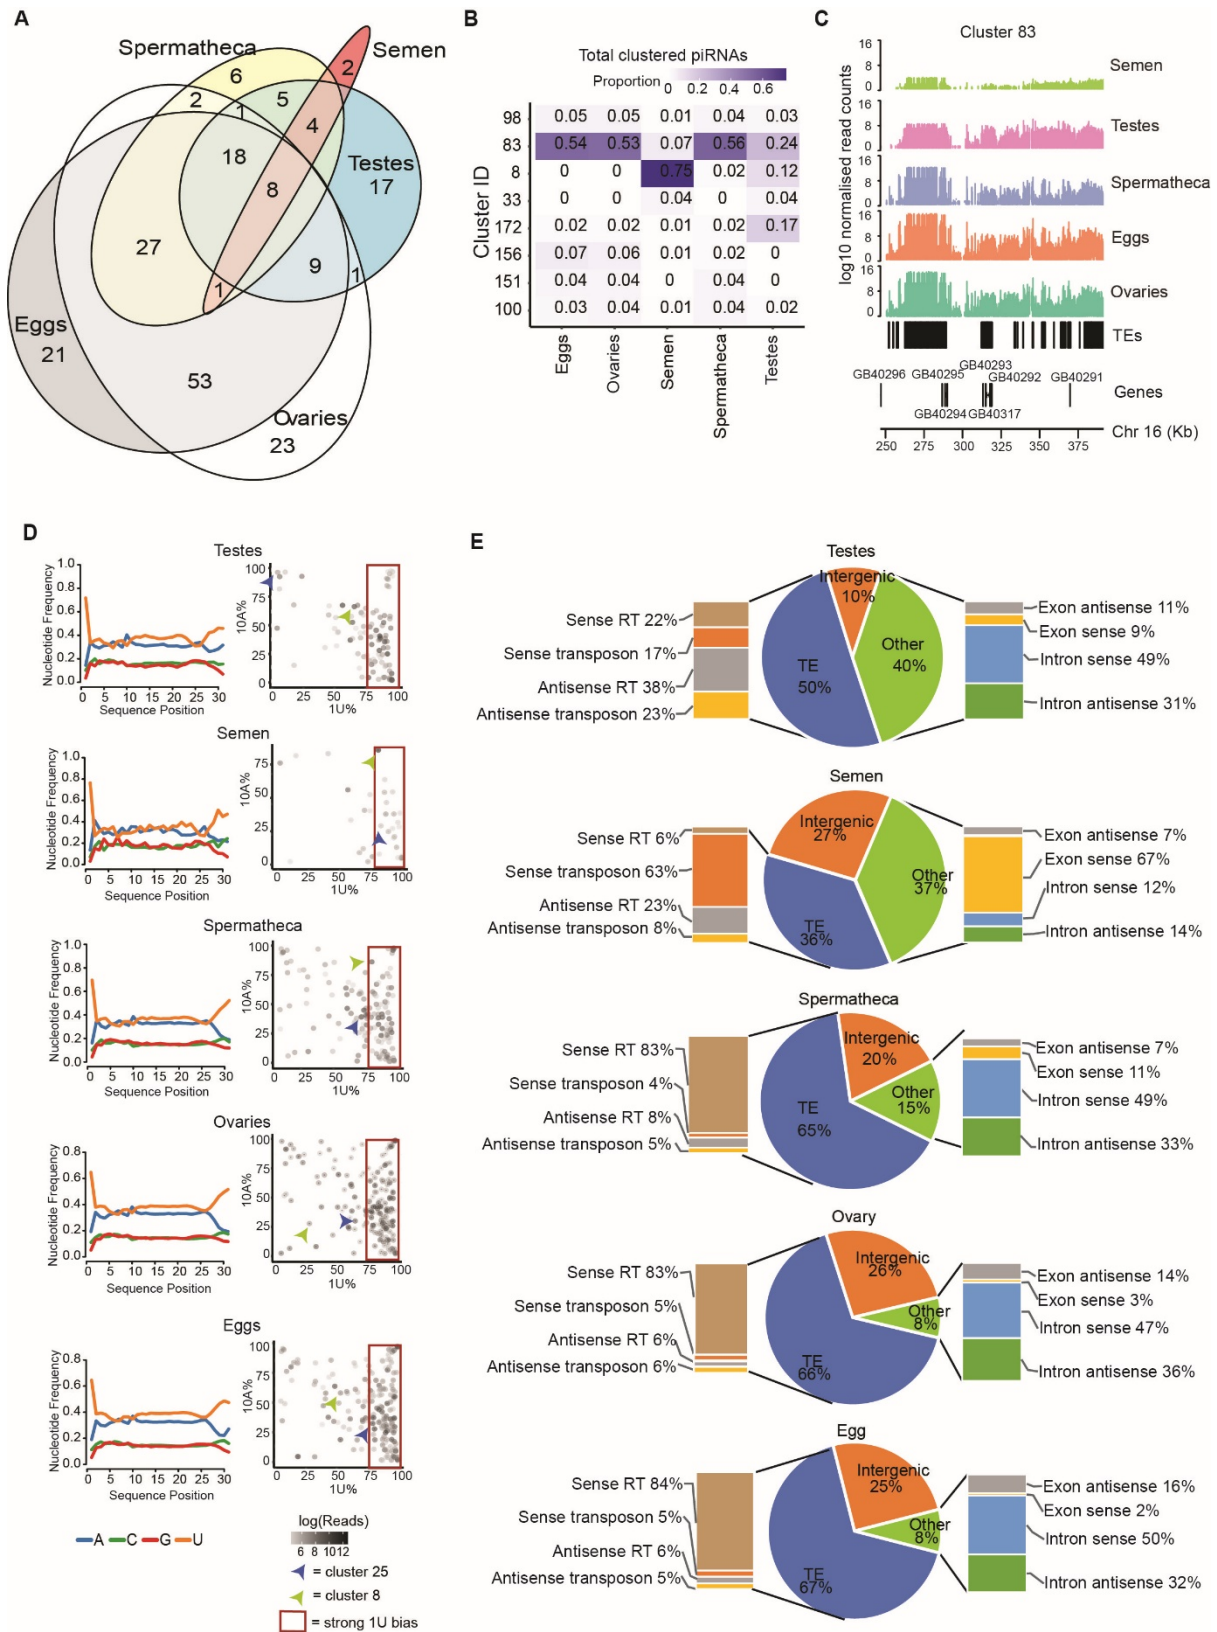

224  
225  
226  
227  
228  
229

**Figure 2. Analysis of piRNAs in the reproductive tissues of the honey bee. A.** Euler diagram showing the overlap of clusters identified within each individual tissue. **B.** Table of the proportion of clustered total/uncollapsed piRNAs that align to the top three most active piRNA clusters for each tissue. **C.** Coverage of piRNAs at Cluster 83 for each tissue. Y-axis values are log<sub>10</sub> RPM (reads per million) normalised values of total reads. **D.** Left: Nucleotide frequency plots for unique piRNAs in ovaries,

230 eggs, testes, semen and spermatheca samples. Right: The 1U and 10A bias of each piRNA cluster,  
231 detected within each tissue individually. Red box indicates clusters with a 1U bias. Cluster 25 (blue  
232 arrow) and cluster 8 (green arrow) are examples of the same piRNA cluster with different 1U and  
233 10A frequencies between tissue types. E. Feature mapping of total piRNAs sense and antisense to  
234 retrotransposons and DNA transposons (left) as well as introns and exons (right)

235 semen ( $Z = 3.38$ ,  $p < 0.001$ ), but not in other tissues (Supplemental Figure 3B). This indicates that  
236 primary piRNAs dominate in semen.

237 Overall, these data support previous findings that honey bees have ping-pong cycling capability  
238 (Wang et al. 2017), but strongly suggest that this activity is highly locus-specific, and not a general  
239 feature of piRNAs biosynthesis. piRNAs that are present in semen are mostly primary piRNAs –  
240 unsurprising, given that spermatozoa are mostly transcriptionally inert (see Discussion).

### 241 piRNA targeting

242 Most piRNA-length reads in maternal tissues mapped to TE-dense piRNA clusters. We hypothesized  
243 that semen and testes would have fewer TE-associated piRNA-length reads, as fewer piRNA clusters  
244 were identified in these tissues. As expected, we found that less than half of piRNA-length reads  
245 mapped to TEs in semen and testes, compared to around 65% in maternal tissues (Figure 2E).

246 Furthermore, TE-mapping piRNAs in ovaries, eggs and spermatheca predominantly mapped to  
247 retrotransposons in the sense direction, whereas piRNAs in semen predominantly mapped to DNA  
248 transposons (Figure 2E), revealing clear tissue specificity in the types of TE targeted by piRNAs. Of  
249 the TEs that have been confidently assigned to TE families (more recently active TEs) (Elsik et al.  
250 2014), the class II transposon Mariner/TC1 was highly targeted by piRNAs in all tissues except  
251 semen, in which the LINE retrotransposon R2 was the most targeted (Supplemental Table S4). Of  
252 putative piRNA reads that map to genes, most align sense to introns for all tissues except semen, in  
253 which the majority align sense to exons (Figure 2E). The relative lack of piRNAs in semen and the  
254 stark difference of targeting and abundance of piRNA-length reads in paternal tissues compared to  
255 all other tissues suggests that piRNAs are a mechanism by which maternal effects could be  
256 mediated.

### 257 Differential expression and target analysis

258 Principal component analysis (PCA) revealed that miRNA, piRNA and tRF profiles differed between  
259 tissue types (Figure 3A). To identify small RNAs that were contributing to the differences between  
260 tissues we performed pairwise differential small RNA expression analysis for each tissue (Figure 3B,  
261 Supplemental Table 3).

## 262 *Ovaries and eggs*

263 There is preliminary evidence that queens may use supplementary epigenetic mechanisms to  
264 influence the sex of their eggs (Oldroyd et al. 2008). However, we found no difference in the  
265 abundance of small RNAs between eggs from mated queens collected from worker cells (fertilized)  
266 and eggs collected from drone cells (unfertilized) (Figure 3B, row 2), indicating that at this age  
267 (<24hrs old) there is no difference in small RNA profiles between fertilised and unfertilised eggs. We  
268 therefore combined the data sets from mated queen eggs obtained from drone cells and worker  
269 cells into a single data set (mated queen eggs). We then compared sRNA profiles between eggs laid  
270 by virgin queens in worker cells with eggs laid in drone cells (both unfertilised). While we did not  
271 detect any differentially expressed (DE) miRNAs or tRFs we did detect 107 DE piRNAs (out of ~2.5  
272 million piRNAs) (Figure 3B, row 1). Given the minimal differences between these two classes of virgin  
273 queen eggs we also pooled these datasets together (virgin queen eggs) for greater statistical power  
274 for comparisons between mated queen eggs and virgin queen eggs. We identified 39 tRFs, 30  
275 miRNAs and 3,586 piRNAs that were DE between eggs from mated queens and eggs from virgin  
276 queens. The majority of these were upregulated in eggs laid by virgin queens (Figure 3B, Figure 4A).  
277 Due to these differences, we kept the virgin and mated queen egg datasets separate for  
278 comparisons with other reproductive tissues.

279 The small RNA expression profiles in the eggs derived from both virgin and mated queen eggs were  
280 more similar to those seen in ovaries than to other tissues. This is expected, as the ovaries are the  
281 site of oogenesis and egg maturation, and the ovaries that we collected came from laying queens  
282 containing hundreds of developing eggs. Nonetheless, differentially expressed tRFs, miRNAs, and  
283 piRNAs were observed between ovary and egg samples (Figure 3B, Supplemental Table S5).  
284 Differentially expressed small RNAs, particularly miRNAs and piRNAs, tended to be upregulated in  
285 ovaries. Any differentially expressed small RNAs must originate in either the maternal ovarian tissue,  
286 arise from differential transport of miRNAs into mature eggs, or arise due to differential expression  
287 early in egg development. The small RNAs upregulated in the ovaries are likely to be derived from  
288 the maternal ovarian tissue and not from the developing oocytes, while the small RNAs upregulated  
289 in the eggs must come from either active transport into the developing oocyte, or early expression in  
290 the embryo. Of the seven miRNAs upregulated in ovaries (relative to both mated and virgin eggs)  
291 three (mir-989, mir-278 and mir-12) have been implicated in ovary development or oogenesis in  
292 insects (Kugler et al. 2013b; Song et al. 2018; Macedo et al. 2016).

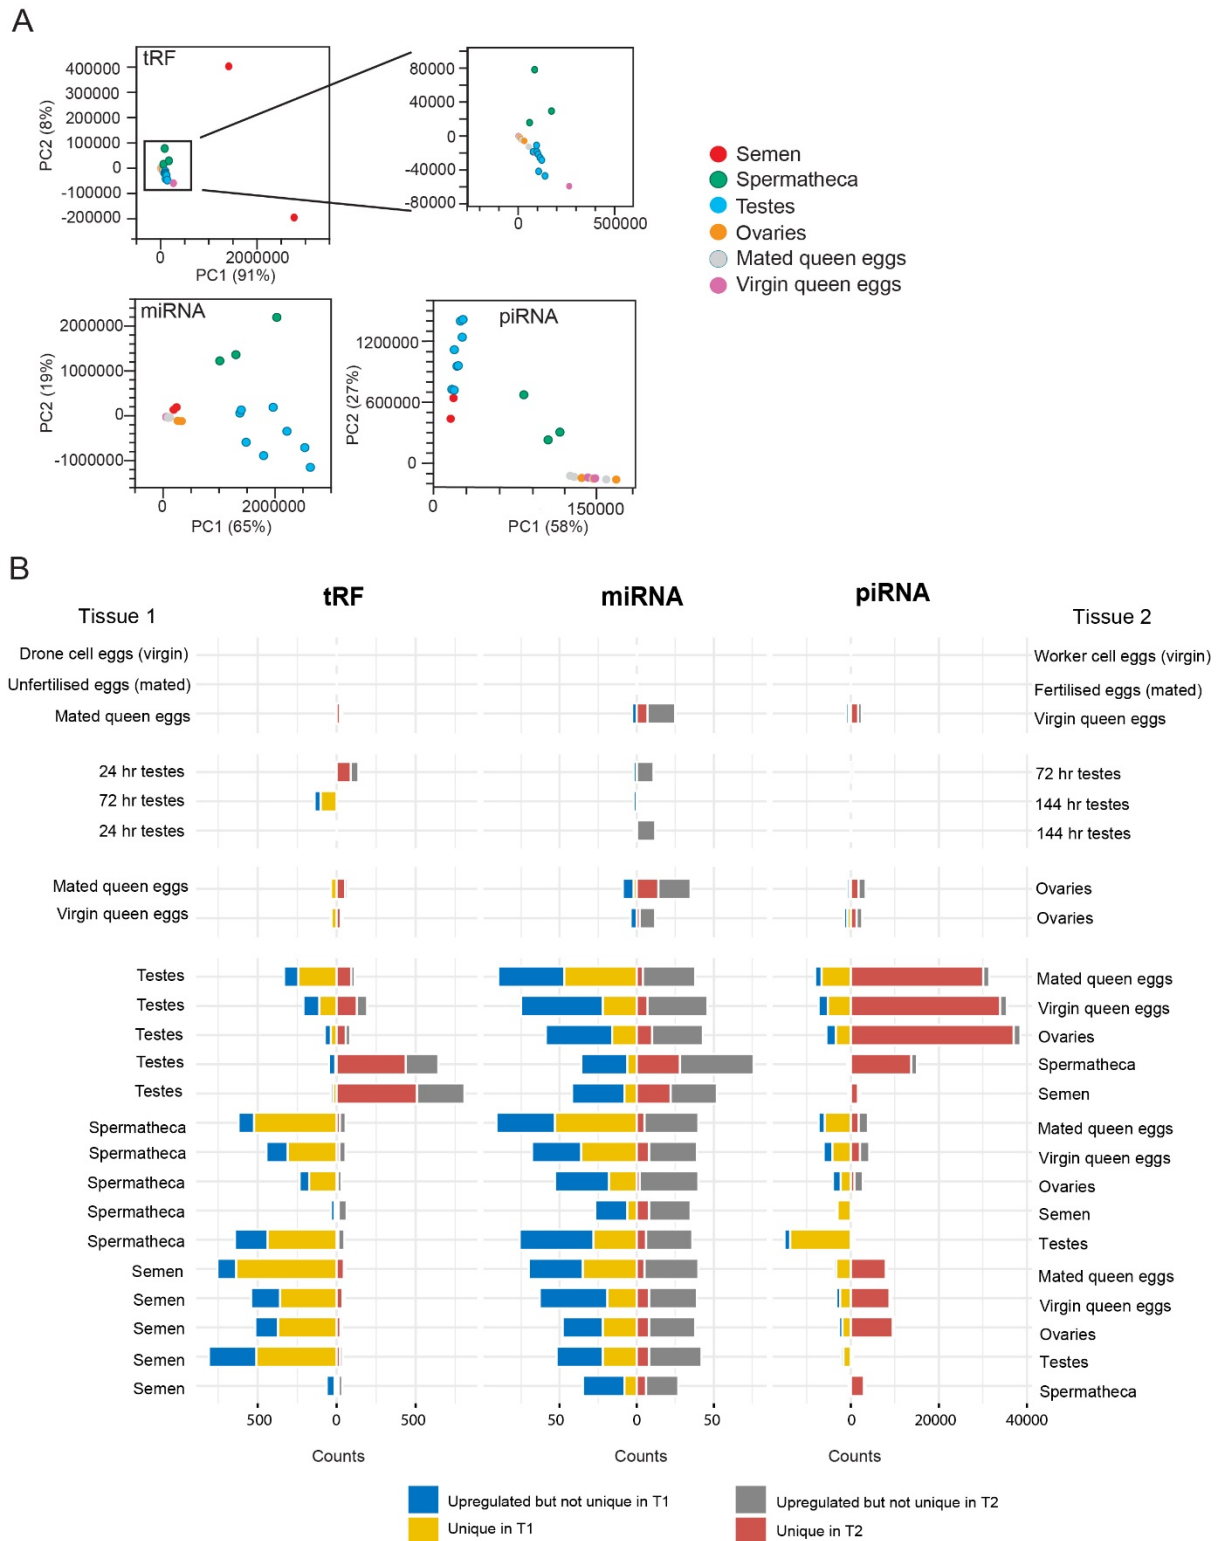

**Figure 3. Differential expression analysis A.** Principal component analysis (PCA) plots on tRF (top), miRNA (bottom left) and piRNA (bottom right) profiles between tissue types. **B.** Differential tRF, miRNA and piRNA expression for pairwise tissue comparisons. Counts of differentially expressed and/or uniquely expressed small RNAs are on the x-axes. Red and grey bars extending to the right refer to the number of small RNAs that are uniquely (red) expressed or upregulated but not unique (grey) in tissue 2 relative to tissue 1. Conversely, the yellow bar extending leftward from the axis

300 refers to the count of uniquely expressed small RNAs expressed in tissue 1 relative to tissue 2, the  
301 blue bar refers to the count of upregulated but not uniquely expressed sRNAs.

### 302 *Developing Testes*

303 During spermatogenesis meiosis occurs as pupation commences and ends with the appearance of  
304 clustered spermatids in red-eyed pupae (Lago et al. 2020). To investigate whether paternally  
305 deposited small RNAs are produced during this process, we compared the testes samples from three  
306 different stages of pupal development; pink-eyed (24 hrs from the commencement of pupation),  
307 red-eyed (72 hrs) and brown-eyed (144 hrs). There were 139 differentially expressed tRFs between  
308 the developing testes of pink-eyed and red-eyed pupae and 140 differentially expressed tRFs  
309 between red-eyed and brown-eyed testes (Figure 4B, Supplemental Table S5). Strikingly, all  
310 differentially expressed tRFs were upregulated in the testes of red-eyed pupae, for each comparison.  
311 However, no tRFs were differentially expressed between pink-eyed and brown eyed pupae (Fig 4B).  
312 These results imply a peak of tRF expression at around 72 hrs of pupal development with  
313 subsequent downregulation. Like tRF expression, there is a drastic increase in piRNA expression  
314 within the testes between 24 and 72 hrs of pupal development (Figure 4C). These piRNAs show  
315 reduced abundance between 72 and 144 hrs, but not as strongly as tRFs. In contrast, miRNAs that  
316 are upregulated at 72 hr testes relative to 24 hr testes tend to remain upregulated in 72 hr testes  
317 and 144 hr testes, representing a trend towards increased miRNA production as the testis develop  
318 (Fig 4D). Of tRFs that were significantly upregulated at 72 hours (red-eyed pupae) relative to other  
319 pupal stages, many multi-mapped to eleven genes, two of which are important gametogenesis genes  
320 in *D. melanogaster*; *Hephaestus (heph)* (Robida et al. 2010; Sridharan et al. 2016) and *CUGBP Elav-*  
321 *like family member 2 (bru-2)* (Dasgupta and Ladd 2012). 72 hours post-fertilisation (red-eyed pupae)  
322 coincides with the end of meiosis and the start of spermiogenesis (Lago et al. 2020): the striking  
323 changes in small RNA expression during this window strongly suggest that small RNAs play an  
324 important role in spermatogenesis. Might they also influence gene expression in the next  
325 generation? For further comparisons we pooled all testes samples together.

### 326 *Spermatheca, semen and testes*

327 In order to determine whether paternal small RNAs are present in tissues relevant to the production  
328 of the next generation we considered the three environments encountered by honey bee sperm  
329 prior to fertilisation: the pupal testes, the adult seminal vesicles and the period of storage in the  
330 spermatheca (Bishop 1920a, 1920b). Strikingly, although tRFs made up 60% of small RNAs in semen  
331 but only 8% of spermathecal small RNAs by abundance (Figure 1B), there are fewer DE tRFs between  
332 semen and spermatheca samples than between other tissue types, suggesting high similarity  
333 between semen and the semen-storage organ (Figure 3B). In contrast, the stark difference in tRF



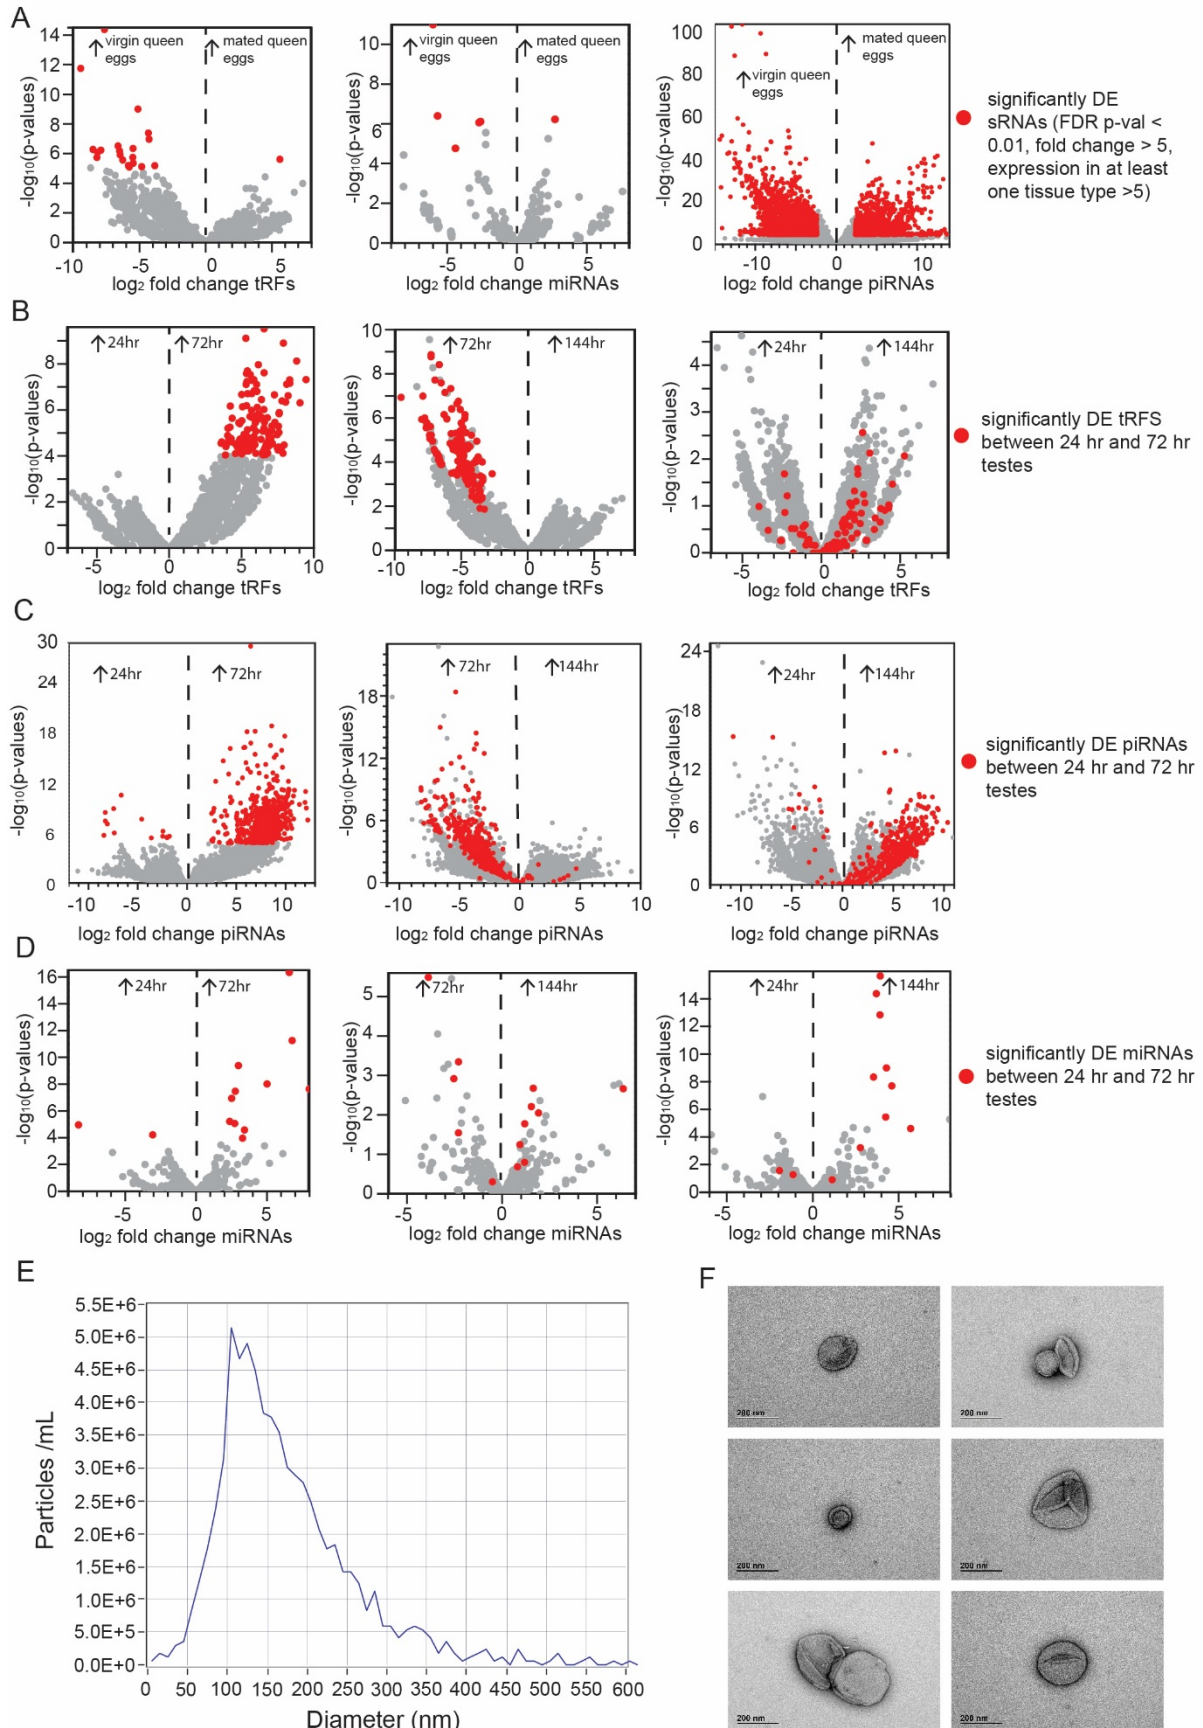

334

335

336

**Figure 4. A.** Volcano plots indicate the patterns of significantly (FDR-corrected) upregulated tRFs (left), miRNA (middle) and piRNAs (right) between eggs laid from virgin queens and eggs laid from



337 mated queens. Arrows refer to upregulation in either virgin or mated queen eggs. **B. C. and D.**  
338 Volcano plots showing differentially expressed tRFs (B), piRNAs (C) and miRNAs (D) between testes  
339 from 24 hr pupae and 72 hr pupae (left), 72 and 144 hr (middle) and 24 and 144 hr (right). Red dots  
340 in all panels indicate the upregulated small RNAs from the 24-72 hr comparisons, grey dots are all  
341 small RNAs analysed. **E.** Zetaview measurement of particles present in honey bee semen indicating  
342 particle size (nm) and concentration (particles/mL). **F.** Representative transmission electron  
343 micrographs of potential EVs in honey bee semen.

344 abundance between semen and testes suggests that a large component of the tRF content in  
345 semen does not come from the testes but is a component of the seminal fluid, which is produced in  
346 the accessory glands (Snodgrass 1910). This observation accords with the previous observation that  
347 tRFs are upregulated in the testes of red-eyed pupae but subsequently downregulated in brown-  
348 eyed pupae. The similarity in tRF expression between semen and spermatheca suggests that tRFs are  
349 a small RNA molecule uniquely placed to provide a paternal influence on early embryonic  
350 development.

351 Small RNAs are often present in extracellular vesicles (EVs) which have been shown to be present in  
352 semen of various organisms (Vojtech et al. 2014; Zhao et al. 2020; Chan et al. 2020). We performed  
353 particle tracking and electron microscopy of freshly collected honey bee semen and detected  
354 particles of the correct size and shape to be EVs (Figure 4E, F). If EVs are indeed present in honey bee  
355 semen they are a plausible mechanism by which small RNAs could be transmitted paternally.

356 A different trend was observed for piRNAs between semen, spermatheca and testes. There were few  
357 DE piRNAs between semen and testes. In contrast, the spermatheca was strongly different, with  
358 approximately 28-fold higher expression of unique piRNAs than in testes (Figure 3B, Supplemental  
359 Table S5). The abundance of piRNAs in the spermatheca is most likely due to piRNA expression in the  
360 maternal cells of the spermatheca itself, or in the maternal component of the spermathecal fluid,  
361 but probably not from spermatozoa.

362 The miRNA compositions between semen, spermatheca and testes are different again. There are  
363 few miRNAs that are unique to the testes, while there are many uniquely expressed miRNAs in the  
364 semen and spermatheca. Although miRNAs make up 82% of small RNAs in the testes, and 58% in the  
365 spermatheca, they comprise only 9% of small RNAs in semen. There are slightly fewer miRNAs  
366 upregulated in semen relative to spermatheca. This could suggest that there is a miRNA component  
367 to the seminal fluid (although substantially less than the tRF contribution shown above), and a  
368 maternal miRNA contribution to the spermathecal fluid. The seven most upregulated miRNAs in  
369 spermatheca relative to semen are also more abundant in spermatheca relative to all other tissues  
370 but are of conspicuously low abundance in eggs (Supplemental Figure 4). This suggests that these

371 miRNAs regulate genes important to early embryogenesis. Indeed mir-317, mir-277 and mir-278 all  
372 play roles in insect development (Shen et al. 2020; Yang et al. 2016; Song et al. 2018).

### 373 *Female tissues compared to male tissues*

374 We sought to investigate how small RNAs differ between male and female reproductive tissues, to  
375 gain insight into how they may utilise different strategies to regulate gene expression and genomic  
376 stability or contribute small RNAs to the next generation. Semen and spermatheca express many  
377 more tRFs than do testes, ovaries, and eggs (Figure 3B, Supplemental Table S5), and thus tRFs are  
378 prime candidates for epigenetic marks passed by fathers to offspring. However, at our significance  
379 thresholds we did not detect any tRFs present in semen, spermatheca and fertilised eggs from  
380 mated queens that were not also in unfertilised eggs from mated queens.

381 Overall, paternal tissues and spermatheca have more abundant and uniquely-expressed miRNAs  
382 relative to eggs and ovaries (Figure 3B, Supplemental Table S5), although not to the same degree as  
383 tRFs. GO analysis of miRNA target genes showed that DNA binding activity involved in transcription  
384 regulation was often enriched for both tissues of a comparison, suggesting that miRNAs that are  
385 differentially expressed between tissues might act on/suppress different DNA-transcription  
386 machinery to regulate the activity of large cellular pathways (Supplemental Table S5). In contrast to  
387 tRFs and miRNAs, many more piRNA species are strongly upregulated in maternal tissues relative to  
388 testes and semen (Figure 3B, Supplemental Table S5). This is further evidence that piRNAs are  
389 expressed in the maternal reproductive tissues and suppressed in the paternal reproductive tissues.  
390 In addition to mapping to TEs, piRNAs also map to genes. GO-term analysis of genes targeted by  
391 piRNAs in ovaries and eggs relative to semen and testes (and presumably therefore downregulated  
392 in maternal tissues) were enriched for terms related to glutamate receptor signalling. Conversely,  
393 genes targeted by piRNAs in semen and testes relative to eggs and ovaries were enriched for terms  
394 related to transcription and development. Genes/clusters which have notably different antisense-  
395 piRNA targeting between tissue types are listed in Table 1, and the top 10 piRNA-targeted genes for  
396 each tissue pairwise comparison are listed in Supplemental Table S6. Full GSEA output is in  
397 Supplemental Table S7. The targeting of genes by piRNAs suggests that piRNAs also regulate gene  
398 expression and developmental pathways.

399 **Table 1 Notable piRNA-targeted genes and clusters**

| piRNAs<br>upregulated in | Relative<br>to | Gene ID<br>(Beebase/Re<br>fseq) | Gene<br>Name | Gene function |
|--------------------------|----------------|---------------------------------|--------------|---------------|
|--------------------------|----------------|---------------------------------|--------------|---------------|

|                               |                                       |                    |                                             |                                                                                                                                                                                                                        |
|-------------------------------|---------------------------------------|--------------------|---------------------------------------------|------------------------------------------------------------------------------------------------------------------------------------------------------------------------------------------------------------------------|
| Eggs, ovaries and spermatheca | Semen and testes                      | GB55060/LO C724287 | <i>rhomboid related protein 3-like</i>      | The rhomboid superfamily of intramembrane serine proteases are involved in developmental patterning as well as mitochondrial fusion during spermatogenesis (McQuibban et al. 2006; Bier et al. 1990).                  |
| Semen                         | Testes, eggs and ovaries              | GB45868/LO C413081 | <i>F-box/WD repeat-containing protein 7</i> | This gene is a homolog of <i>archipelago</i> in <i>Drosophila</i> , required for endocycles and mediates the negative regulation of cell growth by protein ubiquitination (Moberg et al. 2004; Shcherbata et al. 2004) |
| Semen                         | Spermatheca, ovaries, testes and eggs | GB54783/LO C408402 | <i>Acetyl-coenzyme A transporter 1</i>      | This gene is implicated in the developmentally regulated modification of O-acetylation of gangliosides in mammals (Kanamori et al. 1997)                                                                               |
| Ovaries, eggs and spermatheca | Semen and Testes                      | Cluster 20         | Sex determination locus                     | Genes implicated in sex determination in <i>Apis mellifera</i> including the <i>complementary sex determiner</i> and <i>feminizer</i> genes.                                                                           |

400

401 Intriguingly, piRNA cluster 20 is much more active in ovaries, eggs and spermatheca relative to testes  
402 and semen (Table 1). Cluster 20 is a unidirectional cluster that maps antisense to most of the genes  
403 located in the cluster. Reads map along the length of the cluster and although there are  
404 transposable elements present in the cluster, they are not exclusively targeted. Cluster 20 overlaps  
405 the *complementary sex determiner* gene (*csd*), *feminizer* gene (*fem*) and GB47023/LOC408733  
406 (*pinocchio*) (Figure 5) (Beye et al. 2003). *csd*, situated within the sex determination region on  
407 chromosome 3, determines the sex of the bee and arose from duplication of the *feminizer* gene  
408 (Hasselmann et al. 2008). Bees heterozygous for *csd* develop into females, whereas bees hemizygous  
409 at this locus develop as haploid males (Beye et al. 2003). The high number of piRNAs at this locus  
410 suggest a role for piRNAs in sex determination.

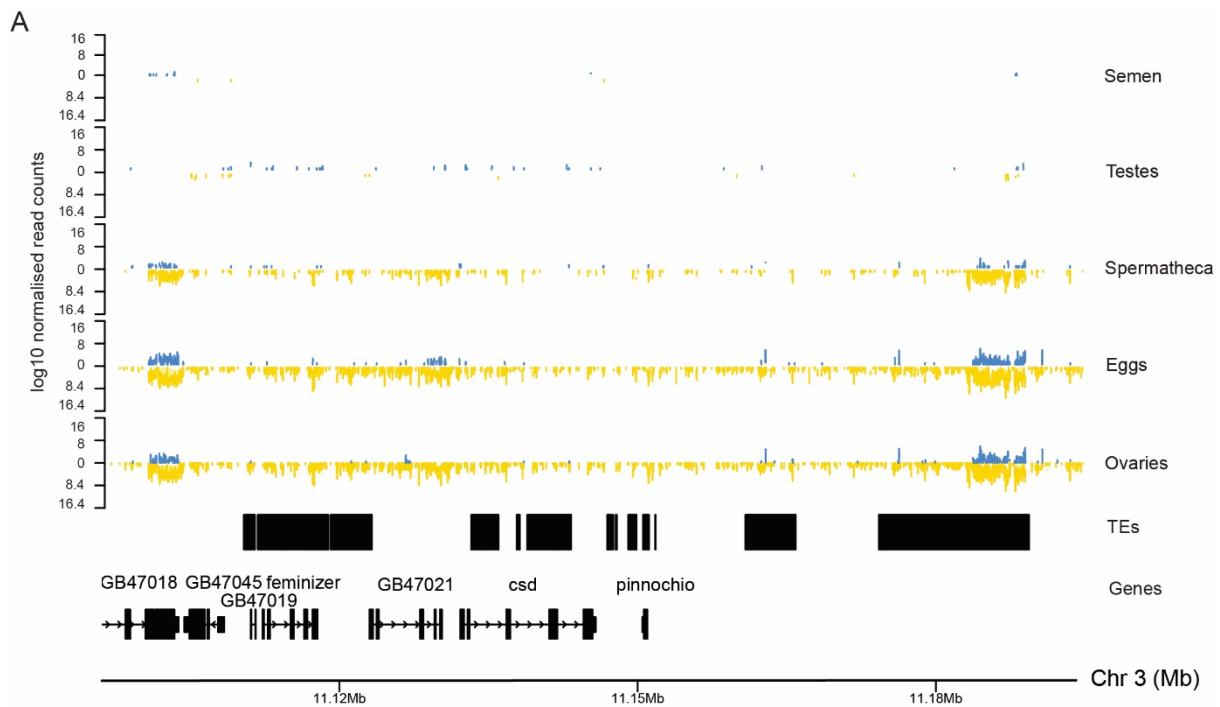

411

412 **Figure 5.** Normalised counts of piRNAs at the *csd* locus (Cluster 20).

## 413 Discussion

414 Our pairwise comparisons of reproductive tissues of the honey bee has revealed strong differences  
415 in small RNA abundance, species and the genomic features that they target. Strikingly, these  
416 differences are strongly indicative that small RNAs function during gametogenesis, in the production,  
417 maturation and storage of semen, and in sex determination. Unique small RNA profiles are seen in  
418 fertilized and unfertilized eggs, and these differ from those seen in the spermathecal fluid. While our  
419 study was by its nature an exploratory survey rather than a test of specific hypotheses, it has  
420 revealed piRNAs and miRNAs are present in ovaries and semen and that these target genes involved  
421 in DNA regulation and developmental processes. tRNA fragments are abundant in semen and have a  
422 similar profile to those seen in the semen of other animals. We conclude that small RNAs are likely  
423 to play an integral role in honey bee gametogenesis and reproduction and provide a plausible  
424 mechanism for parent-of-origin-effects on gene expression and reproductive physiology. Below we  
425 discuss the potential function of the various small RNA classes in different tissues.

### 426 Small RNAs as potential mediators of paternal effects

427 tRFs made up around 60% of total small RNAs in semen, and although less abundant in spermatheca,  
428 the proportional abundance of tRF species was similar, suggesting that a large proportion of the tRFs  
429 present in the queen's spermatheca are transferred there via spermatozoa or seminal fluid. The low  
430 frequency of tRFs in honey bee testis suggests that honey bee semen acquires tRFs from

431 epididymosomes during transit through the epididymis, a process that coincides with spermatozoa  
432 acquiring their fertilising ability and motility. This process also occurs in mammals (Sharma et al.  
433 2018, 2016) where seminal tRFs, particularly tRF<sup>GlyGCC</sup>, are acquired during epididymal transit. In  
434 mammals, tRFs are involved in the repression of embryonically expressed genes in developing  
435 offspring (Sharma et al. 2018, 2016; Schorn et al. 2017; Conine et al. 2018; Cropley et al. 2016). The  
436 high abundance of tRF<sup>GlyGCC</sup> in honey bee semen highlights a striking evolutionary conservation and  
437 suggests that tRFs have a role in mediating paternal effects in honey bees and potentially in other  
438 insects. For example, Liberti and colleagues (Liberti et al. 2019) suggest that factors in seminal fluid  
439 cause queens to cease mating flights, a potential point of sexual conflict. Queens should prefer many  
440 matings to increase offspring diversity (Oldroyd and Fewell 2007) and to reduce worker-worker  
441 conflicts (Ratnieks 2015), whereas drones can maximise their probability of fathering offspring if  
442 their partner queen's mating flights cease after his mating.

443 The structure of a honey bee society is predicated by the fact that a single diploid queen mates with  
444 20 or more haploid males to produce a colony of half-sisters. It is well established that not all sub-  
445 families are equal; some are more likely to be reared as queens (Withrow and Tarpy 2018), and  
446 workers of some rare subfamilies are much more likely to become reproductively active than  
447 average (Châline et al. 2002; Oldroyd et al. 1994; Montague and Oldroyd 1998). Further, offspring  
448 gene expression and phenotype are influenced by paternity in reciprocal crosses between honey bee  
449 subspecies (reviewed in Oldroyd and Yagound (Oldroyd and Yagound 2021)).

450 Our work implicates seminal tRFs as a potential mechanism by which these effects may be mediated  
451 by affecting gene expression during the early development of the embryo. Further, the presence of  
452 extracellular vesicles in semen shows a potential route for transmission for tRFs from father to  
453 daughter. Nonetheless, it is difficult to see how tRFs produced by males could be transferred to eggs  
454 at an abundance that is sufficient to reliably influence embryonic development. In this context it is  
455 important to note that queens use stored sperm from the spermatheca to fertilise eggs over a  
456 lifespan that can exceed four years. This period of storage provides the opportunity for queens to  
457 ameliorate any paternal effects mediated by semen. We conclude that the function of paternal-  
458 origin tRFs in semen and spermatheca is far from clear.

459 Most novel miRNAs were identified in pupal testes and spermatheca. miR-210 was highly  
460 upregulated in testes, semen and spermatheca relative to ovaries and eggs. miR-210 is one of the  
461 most well-studied miRNAs across a range of species and is a master regulator of gene networks  
462 controlling neuronal development, circadian rhythm and photoreception (Cusumano et al. 2018). In  
463 *D. melanogaster*, miR-210 overexpression during development causes visual defects, however miR-

464 210 expression is also required for photoreceptor maintenance and survival via regulating acetyl  
465 coenzyme A synthetase expression (Weigelt et al. 2019; Lyu et al. 2021). As strictly regulated  
466 expression of miR-210 is required for vision in *D. melanogaster*, miR-210 of paternal origin may be  
467 required for appropriate vision development in honey bees. miR-210 is also a candidate molecule to  
468 signal queens to cease mating flights after a successful mating (Liberti et al. 2019). Similarly, miR-34  
469 is upregulated in testes, semen and spermatheca relative to eggs. Interestingly, miR-34 is maternally  
470 inherited in *Drosophila* and regulates synaptogenesis (McNeill et al. 2020) and neuronal  
471 differentiation during embryogenesis (Soni et al. 2013).

## 472 Small RNAs may be maternally deposited in honey bees

473 In *D. melanogaster* piRNAs are maternally deposited in eggs, and this contribution is required for TE  
474 repression in the early embryonic development of offspring (Brennecke et al. 2008; Akkouche et al.  
475 2013; Chambeyron et al. 2008). The high abundance of piRNAs that mapped to TEs in both egg and  
476 ovary samples suggests that the same is true in honey bees. During oogenesis in the honey bee  
477 ovary, intercellular cytoplasmic bridges allow cytoplasmic contents to be directly transferred from  
478 ovarian nurse cells into the oocyte in a process known as “nurse cell dumping” (Cavaliere et al.  
479 1998). This suggests that, as is the case in *Drosophila*, piRNAs are transferred from honey bee nurse  
480 cells into the oocyte, priming it for TE repression upon zygotic genome activation. In addition to their  
481 role in TE repression, we found antisense gene-associated piRNAs in all reproductive tissues,  
482 indicating that some piRNAs function in gene regulation, rather than TE suppression, as has been  
483 shown in other species (Gou et al. 2014; Zhang et al. 2015). Interestingly, we found that glutamate  
484 receptor signalling genes are enriched as targets of piRNAs in maternal tissues, whereas anatomical  
485 development genes are enriched as targets of piRNAs in semen and testes. This is suggestive that  
486 piRNAs are involved in regulating developmental processes post-fertilisation as has been shown in *D.*  
487 *melanogaster* (Lempradl et al. 2021).

488 Eggs of mated queens, (both fertilised and non-fertilised) showed different small RNA profiles to  
489 virgin queens. Queens have control over egg fertilisation, and can therefore control the sex of their  
490 offspring (Ratnieks and Keller 1998). It is possible that virgin queens add more spermathecal fluid to  
491 their eggs than mated queens, perhaps as an attempt to compensate for a lack of sperm in their  
492 spermatheca, and that this alters the small RNAs present in the eggs of mated and virgin queens. In  
493 order to study this rigorously, freshly laid eggs (<2 hr) would need to be collected to detect  
494 differences before development begins. We note that in order to induce oviposition in virgin queens  
495 it is necessary to subject them to two rounds of CO<sub>2</sub>-induced narcosis (Mackensen 1947) which is a  
496 potential confounding factor (Manfredini et al. 2015). However, even if the changes in small RNA



497 profiles that we observed in the eggs of virgin queens are caused by the CO<sub>2</sub> treatment of the  
498 queens, it still indicates a maternal effect and communication of environmental factors between  
499 generations via small RNA molecules.

## 500 Control of transposable elements

501 We have identified evidence for ping-pong amplification of piRNAs at specific piRNA clusters and TEs  
502 (see below). However, the vast majority of piRNAs in honeybee reproductive tissues arise via  
503 primary biogenesis. The overall paucity of ping-pong signatures and the high proportion of sense-TE  
504 mapping reads at many piRNA clusters, including the highly active piRNA cluster 83, indicates that  
505 most piRNAs are derived from now-inactive TE remnants, as is the case in *Drosophila* (Senti and  
506 Brennecke 2010). While most piRNAs show no ping-pong signature, piRNAs targeting annotated TEs  
507 in female reproductive tissues mapped mostly to the PiggyBac and Mariner TE families, as shown  
508 previously (Wang et al. 2017), and had much stronger ping-pong signatures than piRNAs that  
509 mapped to unclassified TEs (probably inactive remnants) (Elsik et al. 2014). This suggests that  
510 PiggyBac and Mariner TEs are transcribed in female reproductive tissues, with potential for  
511 transposition, therefore requiring robust piRNA-mediated silencing that involves ping-pong  
512 amplification. In contrast, in semen the retrotransposon LINE R2 is the only TE highly targeted by  
513 piRNAs, suggesting that it is transcriptionally active. Interestingly, LINE-1 retrotransposons produce  
514 functional reverse transcriptase in murine spermatozoa (Giordano et al. 2000), and have even been  
515 suggested as a mechanism by which extrachromosomal RNA carried by sperm could influence gene  
516 expression in progeny, perhaps by negatively regulating miRNA biogenesis (Spadafora 2017). As  
517 such, paternally inherited piRNAs that silence LINE-1 reverse transcription may permit biogenesis of  
518 certain miRNAs. Our data suggests that the presence of active LINE retrotransposons, and thus their  
519 reverse transcriptase, is highly conserved in spermatozoa, suggesting that drones may be able to  
520 influence embryonic development of their daughters via inhibition of LINE-1 activity.

## 521 A role for piRNAs in sex determination?

522 The unidirectional piRNA cluster 20 encompasses two key genes involved in the sex determination  
523 pathway: *csd* and *feminizer*. This cluster includes abundant piRNAs that align antisense to *csd*. We  
524 speculate that piRNAs transcribed from this locus may regulate the expression or splicing of genes  
525 involved in sex determination as has been demonstrated in the silk moth *Bombyx mori*, where a  
526 single piRNA transcribed from *feminizer* silences a gene that controls masculinization in male  
527 embryos (Kiuchi et al. 2014) Involvement of piRNAs in sex determination is also known in *C. elegans*,  
528 where an X-chromosome derived piRNA silences a regulator of X-chromosome dosage compensation  
529 and sex determination (Tang et al. 2018). In fertilized honeybee embryos, *csd* heterozygosity leads to

530 an active CSD protein that splices *feminizer* transcripts. The spliced Fem protein is active and in turn  
531 splices *doublesex* transcripts, leading to female development (Biewer et al. 2015). Hemizyosity for  
532 *csd* leads to normal male development whereas homozygosity leads to diploid males that are eaten  
533 by workers early in embryonic development (Woyke 1963). RNAi knockdown of *feminizer* and/or *csd*  
534 results in female to male phenotypic sex reversion (Beye et al. 2003) as does knock out of *feminizer*  
535 and/or *doublesex* (McAfee et al. 2019). It is not clear how heterozygosity at the *csd* locus results in  
536 fertile diploid females: one suggestion is that *csd* alleles form an active heterodimer (Beye 2004).  
537 Our finding that many piRNAs present in female reproductive tissues map antisense to the *csd* locus  
538 introduces another possibility; that piRNAs transcribed from one *csd* allele may affect expression or  
539 splicing of the second *csd* allele. In such a case a high level of sequence similarity between two *csd*  
540 alleles may be compensated for by piRNA-mediated silencing that results in female development  
541 despite a level of genetic homozygosity that would normally produce a male.

## 542 **Conclusions**

543 The germline transmission of small RNAs in honey bees has not previously been studied. This study is  
544 the first to conduct pairwise comparisons of small RNA expression between reproductive tissues of  
545 maternal and paternal origin. We find evidence that, as with mammals, nematodes, and *Drosophila*,  
546 small RNAs are intimately involved in the regulation of gametogenesis and embryogenesis in the  
547 honey bee and provide a plausible but tentative pathway for parental manipulation of gene  
548 expression in offspring. Future studies will seek to experimentally validate the role of small RNAs at  
549 key loci such as the sex-determination locus (*csd* and *feminizer*) and to uncover the role of seminal  
550 tRFs. Studies such as these are essential to illuminating our understanding of how epigenetic  
551 mechanisms evolve to promote individual fitness.

## 552 **Methods**

### 553 **Sample Collection**

#### 554 *Semen*

555 In February 2015 mature drones were sampled randomly from 3 colonies. Semen from 10 drones  
556 per colony was collected into sterile glass insemination tips using standard procedures used during  
557 honey bee artificial insemination (Harbo 1986). Semen from each sample was expelled directly into  
558 0.5 ml Trizol and the tube vigorously flicked to disperse the semen in the reagent. The preparation  
559 was then frozen at -70 until RNA extraction.

#### 560 *Eggs from unmated queens*

561 In January 2015 we established four nucleus colonies and introduced one queen pupa to each using  
562 standard methods {Harbo, 1986, Propagation and instrumental insemination}. The sister queens

563 were prevented from leaving the nucleus colonies via a 'queen excluder' grid placed over the  
564 entrance which was sufficiently large to allow the passage of workers, but too small to allow the  
565 passage of queens. When the queens were 7 days old we narcotized them with carbon dioxide for  
566 10 minutes, once a day for two days, to induce oviposition, even though they had not mated  
567 (Mackensen 1947). Once the queens had started laying we provided drone comb and worker comb  
568 to the colonies. Over several weeks we collected eggs 0-24 hours old into 0.5 ml Trizol from drone  
569 comb and worker comb. Eggs disintegrated on contact with the Trizol. Each sample consisted of 59-  
570 200 eggs. Samples were frozen at -70 C after collection.

#### 571 *Eggs from mated queens*

572 Eggs were collected in September 2015 from three colonies headed by naturally mated queens of  
573 unknown age. Eggs were collected separately from drone and worker cells into 0.5 ml Trizol as  
574 above.

#### 575 *Spermathecae*

576 In March 2016 10 naturally-mated laying queens were removed from their colonies and taken to the  
577 laboratory. Queens were frozen, and the ovaries and spermatheca were removed by dissection as  
578 described in Dade (1977) (Dade 1977). Tissue was placed separately in 0.5 ml Trizol and immediately  
579 frozen.

#### 580 *Testes*

581 In August 2016, a section of brood comb containing newly capped drone larvae was collected from a  
582 single colony and taken into the laboratory. White eyed drone pupae were extracted from their cells  
583 and placed in petri dishes lined with filter paper soaked in 12% glycerol. Pupae were incubated at  
584 34.5 C, 50% relative humidity, and staged to collect developing testes at three time points. On day 1  
585 (24 hours post-incubation), pink-eyed pupae were collected and testes removed from the abdomen  
586 by piercing the cuticle with forceps and aspirating testes tissue using a P1000 pipette tip that had  
587 been widened by removing the end of the tip with sterile scalpel. Red-eyed pupae were collected on  
588 day 3 (72 hours post-incubation) and brown-eyed pupae on day 6 (144 hours post-incubation) and  
589 testes removed as described. Samples were frozen immediately on dry ice and stored at -80 C prior  
590 to RNA extraction. Two individual drone pupae samples were used to generate two replicate small  
591 RNA libraries for each timepoint.

#### 592 *RNA extractions*

593 Frozen tubes containing the sample and 500 µl Trizol were thawed on ice. The sample was then  
594 homogenized with a RNase free pellet pestle and RNA extracted using Trizol according to the  
595 manufacturer's instructions (Life Technologies).

## 596 Transmission electron microscopy

597 For Extracellular Vesicles' imaged using transmission electron microscopy (TEM), samples were  
598 diluted 1:200 in PBS and applied to formvar-coated grids with heavy carbon coating after fixation in  
599 glutaraldehyde (2% v/w in H<sub>2</sub>O) for 30 mins, room temperature, or overnight at 4°C. Samples were  
600 visualized by negative staining with uranyl acetate (2% w/v in H<sub>2</sub>O), with images captured using a  
601 Joel JEM-2100 electron microscope.

## 602 Nanoparticle tracking analysis of isolated exosomes

603 Extracellular Vesicles' were analyzed for size and concentration via the Zetaview instrument model  
604 Basic-PMX120 installed with a 405 nm laser diode (Particle Metrix). Vesicles were prepared with a  
605 1:20,000 dilution in dPBS to an average 149 particles per frame. For each measurement, "high"  
606 (60fps) number of frames were captured for 11 positions; Camera sensitivity was 80; Shutter was  
607 100; After capture, analysis was performed by ZetaView Software version 8.05.12 SP1.

## 608 Small RNA Library prep and mapping

609 Small RNA libraries were prepared according to the manufacturer's instructions (Illumina TruSeq  
610 Small RNA Library Prep Kit, Part # 15004197 Rev. G) unless stated otherwise. Input amount for  
611 library preparation was 1.5 µg of total RNA, quantified using a NanoDrop Spectrophotometer. PCR  
612 amplification was performed for 15 instead of 11 cycles. The amplified cDNA construct was purified  
613 on 6% TBE polyacrylamide gels. Gel bands between 145 bp and 160 bp in size, which correspond to  
614 adapter ligated 22 nt and 30 nt RNA fragments, were excised and purified. The final library was  
615 concentrated by ethanol precipitation and the pellet was resuspended in 10 µl 10 mM Tris-HCl, pH  
616 8.5. Libraries were sequenced at the Australian Genome Research Facility using the Illumina HiSeq-  
617 Single Read (50/100) chemistry.

618 Small RNA libraries were mapped to the Amel4.5 genome using CLC Genomics (Qiagen). Biotype  
619 annotations were assigned using the Annotate and Merge tool.

## 620 Novel miRNA identification

621 Novel miRNA prediction tool mirDeep2 (Friedländer et al. 2012) was used to predict novel miRNAs in  
622 each tissue (biological replicates pooled). CLC Genomics (Qiagen) was used to manually confirm  
623 expression of each predicted miRNA: those for which expression could not be confirmed (expression  
624 <5 in all tissues) were removed.

## 625 Validation of miRNAs by stem-loop RT-PCR

626 For the validation of miRNAs by stem-loop RT-PCR independent samples were collected in  
627 September 2017. Total RNA of pink, red and brown testis, semen, eggs, ovaries and spermathecae  
628 was extracted, procedure for tissue collection and RNA extraction as described above. The protocol  
629 for miRNA validation by stem-loop RT-PCR was adapted from Ashby et al (2015) (Ashby et al. 2016)  
630 and Varkonyi-Gasic et al (2007) (Varkonyi-Gasic et al. 2007). Primers for stem-loop RT-PCR were  
631 designed with a miRNA primer design tool (Astridresearch:  
632 <http://genomics.dote.hu:8080/mirnadesigntool/processor>), using the base stack melting temp  
633 primer (Czimmerer et al. 2013) (Supplemental Table S8).

634 For Reverse Transcription in a final volume of 20 ul 50 ng of total RNA was combined with 50 nM of  
635 the StemLoop RT primer, 0.25 mM dNTP mix and nuclease free water to 13.65 ul. The mixture was  
636 heated to 65°C for 5 minutes followed by a 2-minute incubation on ice. 6.35 ul of the enzyme mix  
637 consisting of 1x First First-Strand buffer, 10 mM DTT, 4 U RNaseOUT, 50 U SuperScript III Reverse  
638 Transcriptase (Life Technologies, Australia) was added and incubated in a Biorad Mycycler  
639 thermalcycler under following conditions: 16 °C for 30 minutes, 42 °C for 30 minutes, heat  
640 inactivated at 85 °C for 5 minutes and cooled to 4 °C. RT-PCR was performed as described by Ashby  
641 et al (2015). For a 15 ul reaction 1 ul of undiluted cDNA was combined with 1x FastStart Universal  
642 Probe Master Mix with Rox (Roche Diagnostics, Australia), 50 nm of the forward and universal  
643 reverse primer, 10 nm of Universal Probe #21 (Roche Diagnostics, Australia). Cycling conditions were  
644 95 °C for 5 minutes, 40 cycles of 95 °C for 10 seconds, 56 °C for 30 seconds, 72 °C for 10 seconds on a  
645 Applied Biosystems FAST 7500 real-time PCR machine using the normal ramp reaction mode.

## 646 piRNA Analysis

647 Prior to cluster identification, unmapped reads and reads that were annotated as other known RNAs  
648 (such as ribosomal and tRNAs, but excluding protein coding RNA) were removed. A custom script  
649 (CREST) was generated to identify genomic regions containing a high density of piRNA reads. After  
650 clusters were identified, those which contained less than 50% of reads of the appropriate size (26-  
651 31nt) were filtered out. proTRAC v2.4.2 (Rosenkranz and Zischler 2012) and piClust (Jung et al. 2014)  
652 were run using the same dataset but excluding reads less than 26nt or greater than 31nt in length to  
653 ensure consistency across packages. Default parameters were used for proTRAC v2.4.2 and piClust  
654 was run using parameters; eps of 10,000, minread of 35 and a cut score of 2. Tissue-specific clusters  
655 which were either overlapping or within 1kb of each other were merged and clusters less than 200  
656 bp in length were removed. Cluster strandedness was determined by calculating the proportion of  
657 collapsed reads mapping to either strand. If one strand mapped more than double the number of

658 piRNAs relative to the other strand, across all tissues, it was assigned as either sense or antisense. If  
659 there were fewer than double the number of reads (collapsed) on either strand, across all tissues,  
660 the cluster was assigned as a dual strand/bidirectional cluster. We identified enrichment of 10  
661 nucleotide overlaps using the tool PPMeter (v 0.4) (Jehn et al. 2018) and phased piRNA signatures  
662 were identified by calculating the 3'-5' distances between putative piRNAs. piRNAs were mapped to  
663 the Amel 4.5 TE dataset (Elsik et al. 2014), TE annotations are divided into TE class and TE  
664 superfamily as many repetitive elements could not be assigned to a superfamily (ie. *Mariner*, *Copia*  
665 *etc*) but were assigned to a class (ie *LARD*, *TRIM* *etc*).

### 666 Target prediction and gene ontology analysis

667 3'UTR sequences were obtained from OGS v3.2 (Beebase). Two miRNA target prediction algorithms,  
668 miRanda (Betel et al. 2010) and RNAhybrid (Kruger and Rehmsmeier 2006) were used to identify  
669 miRNA 3'UTR-gene targets. Only miRNA-target interactions predicted by both algorithms were used  
670 for GO analysis. The targets were matched against each list of differentially expressed miRNA, for  
671 each pairwise tissue comparison, and the genes searched using the graphical gene set enrichment  
672 tool ShinyGO v 0.61 to obtain enriched biological process, cellular component and molecular  
673 function terms, KEGG pathways and promoter motifs {Ge, 2020 #55}. To determine the cellular  
674 processes that piRNAs may regulate in each tissue type we sought to identify genes and TEs that are  
675 differentially targeted for each pairwise tissue comparison. Genes and TEs which had significantly  
676 more putative piRNAs mapping antisense to them in one tissue relative to another were assigned as  
677 differentially targeted. The Featurecounts command, as part of the Rsubread package (v. 1.22.2),  
678 was used to counts reads mapping to TEs and genes (including introns, exons, 3'UTR and 5'UTR).  
679 Intergenic reads were calculated by subtracting reads mapping to TEs and/or gene elements from  
680 the putative piRNA count (after length filtering).

### 681 Data Access

682 All raw and processed sequencing data generated in this study have been submitted to the NCBI  
683 Gene Expression Omnibus (GEO; <https://www.ncbi.nlm.nih.gov/geo/>) under accession number  
684 GSE182720.

### 685 Competing interest statement

686 The authors declare no competing interests.

### 687 Acknowledgments



688 This work was supported by Australian Research Council grant DP150100151 to BPO and AA. AA is  
689 supported by the Australian Research Council (DE140100199 and FT180100653). The authors thank  
690 Dr Ros Gloag for helpful discussions about the *csd* locus.

## 691 **References**

- 692 Akkouche A, Grentzinger T, Fablet M, Armenise C, Bulet N, Braman V, Chambeyron S, Vieira C. 2013.  
693 Maternally deposited germline piRNAs silence the tirant retrotransposon in somatic cells.  
694 *EMBO Rep.*
- 695 Akkouche A, Mugat B, Barckmann B, Varela-Chavez C, Li B, Raffel R, Pélisson A, Chambeyron S. 2017.  
696 Piwi Is Required during Drosophila Embryogenesis to License Dual-Strand piRNA Clusters for  
697 Transposon Repression in Adult Ovaries. *Mol Cell* **66**: 411-419.e4.
- 698 Anand A, Kai T. 2012. The tudor domain protein kumo is required to assemble the nuage and to  
699 generate germline piRNAs in Drosophila. *EMBO J* **31**: 870–882.
- 700 Andersen PR, Tirian L, Vunjak M, Brennecke J. 2017. A heterochromatin-dependent transcription  
701 machinery drives piRNA expression. *Nature* **549**: 54–59.
- 702 Ashby R, Forêt S, Searle I, Maleszka R. 2016. MicroRNAs in Honey Bee Caste Determination. *Sci Rep*  
703 **6**: 18794.
- 704 Barckmann B, Pierson S, Dufourt J, Papin C, Armenise C, Port F, Grentzinger T, Chambeyron S,  
705 Baronian G, Desvignes J-P, et al. 2015. Aubergine iCLIP Reveals piRNA-Dependent Decay of  
706 mRNAs Involved in Germ Cell Development in the Early Embryo. *Cell Rep* **12**: 1205–1216.
- 707 Benito E, Kerimoglu C, Ramachandran B, Pena-Centeno T, Jain G, Stilling RM, Islam MR, Capece V,  
708 Zhou Q, Edbauer D, et al. 2018. RNA-Dependent Intergenerational Inheritance of Enhanced  
709 Synaptic Plasticity after Environmental Enrichment. *Cell Rep* **23**: 546–554.
- 710 Betel D, Koppal A, Agius P, Sander C, Leslie C. 2010. Comprehensive modeling of microRNA targets  
711 predicts functional non-conserved and non-canonical sites. *Genome Biol* **11**: R90.
- 712 Beye M. 2004. The dice of fate: the *csd* gene and how its allelic composition regulates sexual  
713 development in the honey bee, *Apis mellifera*. *BioEssays* **26**: 1131–1139.
- 714 Beye M, Hasselmann M, Fondrk MKK, Page RE, Omholt SW. 2003. The Gene *csd* Is the Primary Signal  
715 for Sexual Development in the Honeybee and Encodes an SR-Type Protein. *Cell* **114**: 419–429.
- 716 Bier E, Jan LY, Jan YN. 1990. rhomboid, a gene required for dorsoventral axis establishment and  
717 peripheral nervous system development in *Drosophila melanogaster*. *Genes Dev* **4**: 190–203.
- 718 Biewer M, Schlesinger F, Hasselmann M. 2015. The evolutionary dynamics of major regulators for  
719 sexual development among Hymenoptera species. *Front Genet* **6**: 124.
- 720 Bishop GH. 1920a. Fertilization in the honey-bee. I. The male sexual organs: Their histological  
721 structure and physiological functioning. *J Exp Zool* **31**: 224–265.
- 722 Bishop GH. 1920b. Fertilization in the honey-bee. II. Disposal of the sexual fluids in the organs of the  
723 female. *J Exp Zool* **31**: 266–286.
- 724 Brennecke J, Aravin AA, Stark A, Dus M, Kellis M, Sachidanandam R, Hannon GJ. 2007. Discrete Small  
725 RNA-Generating Loci as Master Regulators of Transposon Activity in *Drosophila*. *Cell* **128**: 1089–  
726 1103.
- 727 Brennecke J, Malone CD, Aravin AA, Sachidanandam R, Stark A, Hannon GJ. 2008. An epigenetic role  
728 for maternally inherited piRNAs in transposon silencing. *Science* **322**: 1387–1392.
- 729 BURT A, Trivers R. 2006. *Genes in Conflict*. Harvard University Press.
- 730 Cannell IG, Kong YW, Bushell M. 2008. How do microRNAs regulate gene expression? *Biochem Soc*  
731 *Trans* **36**: 1224–1231.
- 732 Cavaliere V, Taddei C, Gargiulo G. 1998. Apoptosis of nurse cells at the late stages of oogenesis of  
733 *Drosophila melanogaster*. *Dev Genes Evol* **208**: 106–112.
- 734 Châline N, Ratnieks FLW, Burke T. 2002. Anarchy in the UK: Detailed genetic analysis of worker  
735 reproduction in a naturally occurring British anarchistic honeybee, *Apis mellifera*, colony using

- 736 DNA microsatellites. *Mol Ecol* **11**: 1795–1803.
- 737 Chambeyron S, Popkova A, Payen-Groschene G, Brun C, Laouini D, Pelisson A, Bucheton A. 2008.
- 738 piRNA-mediated nuclear accumulation of retrotransposon transcripts in the *Drosophila* female
- 739 germline. *Proc Natl Acad Sci* **105**: 14964–14969.
- 740 Chan JC, Morgan CP, Adrian Leu N, Shetty A, Cisse YM, Nugent BM, Morrison KE, Jašarević E, Huang
- 741 W, Kanyuch N, et al. 2020. Reproductive tract extracellular vesicles are sufficient to transmit
- 742 intergenerational stress and program neurodevelopment. *Nat Commun* **11**: 1–13.
- 743 Chen Q, Yan M, Cao Z, Li X, Zhang Y, Shi J, Feng G -h., Peng H, Zhang X, Zhang Y, et al. 2016a. Sperm
- 744 tsRNAs contribute to intergenerational inheritance of an acquired metabolic disorder. *Science*
- 745 (80-) **351**: 397–400.
- 746 Chen Q, Yan W, Duan E. 2016b. Epigenetic inheritance of acquired traits through sperm RNAs and
- 747 sperm RNA modifications. *Nat Rev Genet* **17**: 733–743.
- 748 Chen X, Ma C, Chen C, Lu Q, Shi W, Liu Z, Wang H, Guo H. 2017. Integration of lncRNA–miRNA–mRNA
- 749 reveals novel insights into oviposition regulation in honey bees. *PeerJ* **5**: e3881.
- 750 Conine CC, Sun F, Song L, Rivera-Pérez JA, Rando OJ. 2018. Small RNAs Gained during Epididymal
- 751 Transit of Sperm Are Essential for Embryonic Development in Mice. *Dev Cell* **46**: 470–480.e3.
- 752 Crean AJ, Bonduriansky R. 2014. What is a paternal effect? *Trends Ecol Evol* **29**: 554–559.
- 753 Cropley JE, Eaton SA, Aiken A, Young PE, Giannoulatou E, Ho JWK, Buckland ME, Keam SP, Hutvagner
- 754 G, Humphreys DT, et al. 2016. Male-lineage transmission of an acquired metabolic phenotype
- 755 induced by grand-paternal obesity. *Mol Metab* **5**: 699–708.
- 756 Cusumano P, Biscontin A, Sandrelli F, Mazzotta GM, Tregnago C, De Pittà C, Costa R. 2018.
- 757 Modulation of miR-210 alters phasing of circadian locomotor activity and impairs projections of
- 758 PDF clock neurons in *Drosophila melanogaster* ed. P.H. Taghert. *PLoS Genet* **14**: e1007500.
- 759 Czech B, Hannon GJ. 2016. One Loop to Rule Them All: The Ping-Pong Cycle and piRNA-Guided
- 760 Silencing. *Trends Biochem Sci* **41**: 324–337.
- 761 Czimmerer Z, Hulvely J, Simandi Z, Varallyay E, Havelda Z, Szabo E, Varga A, Dezso B, Balogh M,
- 762 Horvath A, et al. 2013. A versatile method to design stem-loop primer-based quantitative PCR
- 763 assays for detecting small regulatory RNA molecules. *PLoS One* **8**: e55168.
- 764 Dade HA. 1977. *Anatomy and dissection of the honey bee*. International Bee Research Association,
- 765 London.
- 766 Dasgupta T, Ladd AN. 2012. The importance of CELF control: molecular and biological roles of the
- 767 CUG-BP, Elav-like family of RNA binding proteins. *Wiley Interdiscip Rev RNA* **3**: 104.
- 768 Drewell RA, Lo N, Oxley PR, Oldroyd BP. 2012. Kin conflict in insect societies: a new epigenetic
- 769 perspective. *Trends Ecol Evol* **27**: 367–373.
- 770 Dufourt J, Bontonou G, Chartier A, Jahan C, Meunier A-C, Pierson S, Harrison PF, Papin C, Beilharz TH,
- 771 Simonelig M. 2017. piRNAs and Aubergine cooperate with Wispy poly(A) polymerase to
- 772 stabilize mRNAs in the germ plasm. *Nat Commun* **8**: 1305.
- 773 Elsik CG, Worley KC, Bennett AK, Beye M, Camara F, Childers CP, de Graaf DC, Debyser G, Deng J,
- 774 Devreese B, et al. 2014. Finding the missing honey bee genes: lessons learned from a genome
- 775 upgrade. *BMC Genomics* **15**: 86.
- 776 Friedländer MR, Mackowiak SD, Li N, Chen W, Rajewsky N. 2012. miRDeep2 accurately identifies
- 777 known and hundreds of novel microRNA genes in seven animal clades. *Nucleic Acids Res* **40**:
- 778 37–52.
- 779 Gainetdinov I, Colpan C, Arif A, Cecchini K, Zamore PD. 2018. A Single Mechanism of Biogenesis,
- 780 Initiated and Directed by PIWI Proteins, Explains piRNA Production in Most Animals. *Mol Cell*
- 781 **71**: 775–790.e5.
- 782 Galbraith DA, Kocher SD, Glenn T, Albert I, Hunt GJ, Strassmann JE, Queller DC, Grozinger CM. 2016.
- 783 Testing the kinship theory of intragenomic conflict in honey bees (*Apis mellifera*). *Proc Natl*
- 784 *Acad Sci U S A* **113**: 1020–1025.
- 785 Gapp K, Jawaid A, Sarkies P, Bohacek J, Pelczar P, Prados J, Farinelli L, Miska E, Mansuy IM. 2014.
- 786 Implication of sperm RNAs in transgenerational inheritance of the effects of early trauma in

- 787 mice. *Nat Neurosci* **17**: 667–9.
- 788 Gebert LFR, MacRae IJ. 2019. Regulation of microRNA function in animals. *Nat Rev Mol Cell Biol* **20**:  
789 21–37.
- 790 Giordano R, Magnano AR, Zaccagnini G, Pittoggi C, Moscufo N, Lorenzini R, Spadafora C. 2000.  
791 Reverse Transcriptase Activity in Mature Spermatozoa of Mouse. *J Cell Biol* **148**: 1107–1114.
- 792 Girard A, Sachidanandam R, Hannon GJ, Carmell MA. 2006. A germline-specific class of small RNAs  
793 binds mammalian Piwi proteins. *Nature* **442**: 199–202.
- 794 Göktaş Ç, Yiğit H, Coşacak Mİ, Akgül B. 2017. Differentially expressed tRNA-derived small RNAs co-  
795 sediment primarily with non-polysomal fractions in *Drosophila*. *Genes (Basel)* **8**: 333.
- 796 Gou L-T, Dai P, Yang J-H, Xue Y, Hu Y-P, Zhou Y, Kang J-Y, Wang X, Li H, Hua M-M, et al. 2014.  
797 Pachytene piRNAs instruct massive mRNA elimination during late spermiogenesis. *Cell Res* **24**:  
798 680–700.
- 799 Grandjean V, Fourné S, De Abreu DAF, Derieppe M-AA, Remy J-JJ, Rassoulzadegan M. 2015. RNA-  
800 mediated paternal heredity of diet-induced obesity and metabolic disorders. *Sci Rep* **5**: 18193.
- 801 Gunawardane LS, Saito K, Nishida KM, Miyoshi K, Kawamura Y, Nagami T, Siomi H, Siomi MC. 2007. A  
802 slicer-mediated mechanism for repeat-associated siRNA 5' end formation in *Drosophila*.  
803 *Science (80- )* **315**: 1587–1590.
- 804 Guzman-Novoa E, Hunt GJ, Page RE, Uribe-Rubio JL, Prieto-Merlos D, Becerra-Guzman F. 2005.  
805 Paternal effects on the defensive behavior of honeybees. *J Hered* **96**: 376–380.
- 806 Haig D. 2010. Colloquium papers: Transfers and transitions: parent-offspring conflict, genomic  
807 imprinting, and the evolution of human life history. *Proc Natl Acad Sci U S A* **107 Suppl**: 1731–  
808 1735.
- 809 Haig D. 1992. Intragenomic conflict and the evolution of eusociality. *J Theor Biol* **156**: 401–403.
- 810 Haig D. 1999. Multiple Paternity and Genomic Imprinting. *Genetics* **151**: 1229–1231.
- 811 Haig D. 2000. The Kinship Theory of Genomic Imprinting. *Annu Rev Ecol Syst* **31**: 9–32.
- 812 Harbo JR. 1986. Propagation and Instrumental Insemination. *Bee Genet Breed* 361–389.
- 813 Hasselmann M, Gempe T, Schiøtt M, Nunes-Silva CG, Otte M, Beye M. 2008. Evidence for the  
814 evolutionary nascence of a novel sex determination pathway in honeybees. *Nature* **454**: 519–  
815 522.
- 816 Haussecker D, Huang Y, Lau A, Parameswaran P, Fire AZ, Kay MA. 2010. Human tRNA-derived small  
817 RNAs in the global regulation of RNA silencing. *RNA* **16**: 673–695.
- 818 He Z, Kokkinaki M, Pant D, Gallicano GI, Dym M. 2009. Small RNA molecules in the regulation of  
819 spermatogenesis. *Reproduction* **137**: 901–911.
- 820 Huang X, Fejes Tóth K, Aravin AA. 2017. piRNA Biogenesis in *Drosophila melanogaster*. *Trends Genet*  
821 **33**: 882–894.
- 822 Hurley J, Roberts D, Bond A, Keys D, Chen C. 2011. Stem-Loop RT-qPCR for MicroRNA Expression  
823 Profiling. *Methods Mol Biol* 33–52.
- 824 Ivanov P, Emara MM, Villen J, Gygi SP, Anderson P. 2011. Angiogenin-induced tRNA fragments inhibit  
825 translation initiation. *Mol Cell* **43**: 613–623.
- 826 Jehn J, Gebert D, Pipilescu F, Stern S, Kiefer JST, Hewel C, Rosenkranz D. 2018. PIWI genes and  
827 piRNAs are ubiquitously expressed in mollusks and show patterns of lineage-specific  
828 adaptation. *Commun Biol* **1**: 1–11.
- 829 Jung I, Park JC, Kim S. 2014. piClust: A density based piRNA clustering algorithm. *Comput Biol Chem*  
830 **50**: 60–67.
- 831 Kanamori A, Nakayama J, Fukuda MN, Stallcup WB, Sasaki K, Fukuda M, Hirabayashi Y. 1997.  
832 Expression cloning and characterization of a cDNA encoding a novel membrane protein  
833 required for the formation of O-acetylated ganglioside: A putative acetyl-CoA transporter. *Proc*  
834 *Natl Acad Sci* **94**: 2897–2902.
- 835 Karaiskos S, Naqvi AS, Swanson KE, Grigoriev A. 2015. Age-driven modulation of tRNA-derived  
836 fragments in *Drosophila* and their potential targets. *Biol Direct* **10**: 1–13.
- 837 Keam S, Hutvagner G. 2015. tRNA-Derived Fragments (tRFs): Emerging New Roles for an Ancient RNA

- 838 in the Regulation of Gene Expression. *Life* **5**: 1638–1651.
- 839 Kim HK, Fuchs G, Wang S, Wei W, Zhang Y, Park H, Roy-Chaudhuri B, Li P, Xu J, Chu K, et al. 2017. A  
840 transfer-RNA-derived small RNA regulates ribosome biogenesis. *Nature* **552**: 57–62.
- 841 Kiuchi T, Koga H, Kawamoto M, Shoji K, Sakai H, Arai Y, Ishihara G, Kawaoka S, Sugano S, Shimada T,  
842 et al. 2014. A single female-specific piRNA is the primary determiner of sex in the silkworm.  
843 *Nature* **509**: 633–636.
- 844 Kocher SD, Tsuruda JM, Gibson JD, Emore CM, Arechavaleta-Velasco ME, Queller DC, Strassmann JE,  
845 Grozinger CM, Gribskov MR, San Miguel P, et al. 2015. A Search for Parent-of-Origin Effects on  
846 Honey Bee Gene Expression. *G3 (Bethesda)* **5**: 1657–1662.
- 847 Kruger J, Rehmsmeier M. 2006. RNAhybrid: microRNA target prediction easy, fast and flexible.  
848 *Nucleic Acids Res* **34**: W451–W454.
- 849 Kugler J-M, Chen Y-W, Weng R, Cohen SM. 2013a. Maternal Loss of miRNAs Leads to Increased  
850 Variance in Primordial Germ Cell Numbers in *Drosophila melanogaster*. *G3*  
851 *Genes/Genomes/Genetics* **3**: 1573–1576.
- 852 Kugler J-M, Verma P, Chen Y-W, Weng R, Cohen SM. 2013b. miR-989 is required for border cell  
853 migration in the *Drosophila* ovary. *PLoS One* **8**: e67075–e67075.
- 854 Lago DC, Martins JR, Dallacqua RP, Santos DE, Bitondi MMG, Hartfelder K. 2020. Testis development  
855 and spermatogenesis in drones of the honey bee, *Apis mellifera* L. *Apidologie* **51**: 935–955.
- 856 Lee M, Choi Y, Kim K, Jin H, Lim J, Nguyen TA, Yang J, Jeong M, Giraldez AJ, Yang H, et al. 2014.  
857 Adenylation of Maternally Inherited MicroRNAs by Wispy. *Mol Cell* **56**: 696–707.
- 858 Lee YCG. 2015. The Role of piRNA-Mediated Epigenetic Silencing in the Population Dynamics of  
859 Transposable Elements in *Drosophila melanogaster* ed. D.A. Petrov. *PLOS Genet* **11**: e1005269.
- 860 Lempradl A, Kugelberg U, Iconomou M, Beddows I, Nätt D, Casas E, Örkenby L, Enders L, Gutierrez  
861 Martinez A, Boonen E, et al. 2021. Intergenerational metabolic priming by sperm piRNAs.  
862 *bioRxiv* 2021.03.29.436592.
- 863 Lewis SH, Quarles KA, Yang Y, Tanguy M, Frézal L, Smith SA, Sharma PP, Cordaux R, Gilbert C, Giraud  
864 I, et al. 2018. Pan-arthropod analysis reveals somatic piRNAs as an ancestral defence against  
865 transposable elements. *Nat Ecol Evol* **2**: 174–181.
- 866 Liberti J, Görner J, Welch M, Dosselli R, Schiøtt M, Ogawa Y, Castleden I, Hemmi JM, Baer-Imhoof B,  
867 Boomsma JJ, et al. 2019. Seminal fluid compromises visual perception in honeybee queens  
868 reducing their survival during additional mating flights. *Elife* **8**: e45009.
- 869 Loher P, Telonis AG, Rigoutsos I. 2017. MINTmap: fast and exhaustive profiling of nuclear and  
870 mitochondrial tRNA fragments from short RNA-seq data. *Sci Rep* **7**: 41184.
- 871 Lyu J, Chen Y, Yang W, Guo T, Xu X, Xi Y, Yang X, Ge W. 2021. The conserved microRNA miR-210  
872 regulates lipid metabolism and photoreceptor maintenance in the *Drosophila* retina. *Cell Death*  
873 *Differ* **28**: 764–779.
- 874 Macedo LMF, Nunes FMF, Freitas FCP, Pires C V, Tanaka ED, Martins JR, Piulachs M-D, Cristino AS,  
875 Pinheiro DG, Simões ZLP. 2016. MicroRNA signatures characterizing caste-independent ovarian  
876 activity in queen and worker honeybees (*Apis mellifera*L.). *Insect Mol Biol* **25**: 216–226.
- 877 Mackensen O. 1947. Effect of Carbon Dioxide on Initial Oviposition of Artificially Inseminated and  
878 Virgin Queen Bees. *J Econ Entomol* **40**: 344–349.
- 879 Manfredini F, Brown MJF, Vergoz V, Oldroyd BP. 2015. RNA-sequencing elucidates the regulation of  
880 behavioural transitions associated with the mating process in honey bee queens. *BMC*  
881 *Genomics* **16**: 563.
- 882 Maori E, Garbian Y, Kunik V, Mozes-Koch R, Malka O, Kalev H, Sabath N, Sela I, Shafir S. 2019. A  
883 Transmissible RNA Pathway in Honey Bees. *Cell Rep* **27**: 1949–1959.e6.
- 884 McAfee A, Pettis JS, Tarpy DR, Foster LJ. 2019. Feminizer and doublesex knock-outs cause honey  
885 bees to switch sexes. *PLOS Biol* **17**: e3000256.
- 886 McJunkin K. 2018. Maternal effects of microRNAs in early embryogenesis. *RNA Biol* **15**: 165–169.
- 887 McNeill EM, Warinner C, Alkins S, Taylor A, Heggeness H, DeLuca TF, Fulga TA, Wall DP, Griffith LC,  
888 Van Vactor D. 2020. The conserved microRNA miR-34 regulates synaptogenesis via



- 889 coordination of distinct mechanisms in presynaptic and postsynaptic cells. *Nat Commun* **11**:  
890 1092.
- 891 McQuibban GA, Lee JR, Zheng L, Juusola M, Freeman M. 2006. Normal Mitochondrial Dynamics  
892 Requires Rhomboid-7 and Affects Drosophila Lifespan and Neuronal Function. *Curr Biol* **16**:  
893 982–989.
- 894 Moberg KH, Mukherjee A, Veraksa A, Artavanis-Tsakonas S, Hariharan IK. 2004. The Drosophila F box  
895 protein archipelago regulates dMyc protein levels in vivo. *Curr Biol* **14**: 965–974.
- 896 Montague CE, Oldroyd BP. 1998. The evolution of worker sterility in honey bees: an investigation  
897 into a behavioral mutant causing a failure of worker policing. *Evolution (N Y)* **52**: 1408–1415.
- 898 Oldroyd BP, Allsopp MH, Gloag RS, Lim J, Jordan LA, Beekman M. 2008. Thelytokous parthenogenesis  
899 in unmated queen honeybees (*Apis mellifera capensis*): central fusion and high recombination  
900 rates. *Genetics* **180**: 359–366.
- 901 Oldroyd BP, Fewell JH. 2007. Genetic diversity promotes homeostasis in insect colonies. *Trends Ecol*  
902 *Evol* **22**: 408–413.
- 903 Oldroyd BP, Smolenski AJ, Cornuet J-M, Crozler RH. 1994. Anarchy in the beehive. *Nat* **371**: 749–749.  
904 **371**: 749–749.
- 905 Oldroyd BP, Yagound B. 2021. Parent-of-origin effects, allele-specific expression, genomic imprinting  
906 and paternal manipulation in social insects. *Philos Trans R Soc Lond B Biol Sci* **376**: 20200425.
- 907 Osborne KE, Oldroyd BP. 1999. Possible causes of reproductive dominance during emergency queen  
908 rearing by honeybees. *Anim Behav* **58**: 267–272.
- 909 Pegoraro M, Marshall H, Lonsdale ZN, Mallon EB. 2017. Do social insects support Haig’s kin theory  
910 for the evolution of genomic imprinting? *Epigenetics* **12**: 725–742.
- 911 Pires CV, De Paula Freitas FC, Cristino AS, Dearden PK, Simões ZLP. 2016. Transcriptome analysis of  
912 honeybee (*Apis Mellifera*) haploid and diploid embryos reveals early zygotic transcription  
913 during cleavage. *PLoS One* **11**: e0146447.
- 914 Queller DC. 2003. Theory of genomic imprinting conflict in social insects. *BMC Evol Biol* **3**: 15.
- 915 Rassoulzadegan M, Grandjean V, Gounon P, Vincent S, Gillot I, Cuzin F. 2006. RNA-mediated non-  
916 mendelian inheritance of an epigenetic change in the mouse. *Nature* **441**: 469–474.
- 917 Ratnieks FLW. 2015. Reproductive Harmony via Mutual Policing by Workers in Eusocial  
918 Hymenoptera. <https://doi.org/10.1086/284846> **132**: 217–236.
- 919 Ratnieks FLW, Keller L. 1998. Queen control of egg fertilization in the honey bee. *Behav Ecol*  
920 *Sociobiol* **44**: 57–61.
- 921 Remnant EJEJ, Ashe A, Young PEPE, Buchmann G, Beekman M, Allsopp MHMH, Suter CMCM, Drewell  
922 RARA, Oldroyd BPBP. 2016. Parent-of-origin effects on genome-wide DNA methylation in the  
923 Cape honey bee (*Apis mellifera capensis*) may be confounded by allele-specific methylation.  
924 *BMC Genomics* **17**: 1–14.
- 925 Robida M, Sridharan V, Morgan S, Rao T, Singh R. 2010. Drosophila polypyrimidine tract-binding  
926 protein is necessary for spermatid individualization. *Proc Natl Acad Sci U S A* **107**: 12570–  
927 12575.
- 928 Rodgers AB, Morgan CP, Leu NA, Bale TL. 2015. Transgenerational epigenetic programming via  
929 sperm microRNA recapitulates effects of paternal stress. *Proc Natl Acad Sci* **112**: 201508347.
- 930 Rosenkranz D, Zischler H. 2012. proTRAC - a software for probabilistic piRNA cluster detection,  
931 visualization and analysis. *BMC Bioinformatics* **13**: 5.
- 932 Rouget C, Papin C, Boureux A, Meunier A-C, Franco B, Robine N, Lai EC, Pelisson A, Simonelig M.  
933 2010. Maternal mRNA deadenylation and decay by the piRNA pathway in the early Drosophila  
934 embryo. *Nature* **467**: 1128–1132.
- 935 Schorn AJ, Gutbrod MJ, LeBlanc C, Martienssen R. 2017. LTR-Retrotransposon Control by tRNA-  
936 Derived Small RNAs. *Cell* **170**: 61-71.e11.
- 937 Senti K-A, Brennecke J. 2010. The piRNA pathway: a fly’s perspective on the guardian of the genome.  
938 *Trends Genet* **26**: 499–509.
- 939 Sharma U, Conine CC, Shea JM, Boskovic A, Derr AG, Bing XY, Belleannee C, Kucukural A, Serra RW,

- 940 Sun F, et al. 2016. Biogenesis and function of tRNA fragments during sperm maturation and  
941 fertilization in mammals. *Science* **351**: 391–396.
- 942 Sharma U, Sun F, Conine CC, Reichholf B, Kukreja S, Herzog VA, Ameres SL, Rando OJ. 2018. Small  
943 RNAs Are Trafficked from the Epididymis to Developing Mammalian Sperm. *Dev Cell* **46**: 481-  
944 494.e6.
- 945 Shcherbata HR, Althausen C, Findley SD, Ruohola-Baker H. 2004. The mitotic-to-endocycle switch in  
946 *Drosophila* follicle cells is executed by Notch-dependent regulation of G1/S, G2/M and M/G1  
947 cell-cycle transitions. *Development* **131**: 3169–3181.
- 948 Shen Z-J, Liu Y-J, Zhu F, Cai L-M, Liu X-M, Tian Z-Q, Cheng J, Li Z, Liu X-X. 2020. MicroRNA-277  
949 regulates dopa decarboxylase to control larval-pupal and pupal-adult metamorphosis of  
950 *Helicoverpa armigera*. *Insect Biochem Mol Biol* **122**: 103391.
- 951 Snodgrass RE. 1910. *The anatomy of the honey bee* /. Government Printing Office,.
- 952 Song J, Li W, Zhao H, Gao L, Fan Y, Zhou S. 2018. MicroRNA let-7 and miR-278 regulate insect  
953 metamorphosis and oogenesis via targeting juvenile hormone early response gene Krüppel-  
954 homolog 1. *Development* **145**: dev170670.
- 955 Soni K, Choudhary A, Patowary A, Singh AR, Bhatia S, Sivasubbu S, Chandrasekaran S, Pillai B. 2013.  
956 miR-34 is maternally inherited in *Drosophila melanogaster* and *Danio rerio*. *Nucleic Acids Res*  
957 **41**: 4470–4480.
- 958 Spadafora C. 2017. Sperm-Mediated Transgenerational Inheritance. *Front Microbiol* **8**: 2401.
- 959 Sridharan V, Heimiller J, Robida MD, Singh R. 2016. High throughput sequencing identifies  
960 misregulated genes in the *drosophila* polypyrimidine tract-binding protein (hephaestus) mutant  
961 defective in spermatogenesis. *PLoS One* **11**: e0150768.
- 962 Tang W, Seth M, Tu S, Shen E-Z, Li Q, Shirayama M, Weng Z, Mello CC. 2018. A Sex Chromosome  
963 piRNA Promotes Robust Dosage Compensation and Sex Determination in *C. elegans*. *Dev Cell*  
964 **44**: 762-770.e3.
- 965 Thomson T, Lin H. 2009. The biogenesis and function of PIWI proteins and piRNAs: progress and  
966 prospect. *Annu Rev Cell Dev Biol* **25**: 355–376.
- 967 Varkonyi-Gasic E, Wu R, Wood M, Walton EF, Hellens RP. 2007. Protocol: a highly sensitive RT-PCR  
968 method for detection and quantification of microRNAs. *Plant Methods* **3**: 12.
- 969 Verhulst EC, Beukeboom LW, van de Zande L. 2010. Maternal Control of Haplodiploid Sex  
970 Determination in the Wasp *Nasonia*. *Science (80- )* **328**: 620–623.
- 971 Vogel JP, Garvin DF, Mockler TC, Schmutz J, Rokhsar D, Bevan MW, Barry K, Lucas S, Harmon-Smith  
972 M, Lail K, et al. 2010. Genome sequencing and analysis of the model grass *Brachypodium*  
973 *distachyon*. *Nature* **463**: 763–768.
- 974 Vojtech L, Woo S, Hughes S, Levy C, Ballweber L, Sauteraud RP, Strobl J, Westerberg K, Gottardo R,  
975 Tewari M, et al. 2014. Exosomes in human semen carry a distinctive repertoire of small non-  
976 coding RNAs with potential regulatory functions. *Nucleic Acids Res* **42**: 7290–7304.
- 977 Wang C, Lin H. 2021. Roles of piRNAs in transposon and pseudogene regulation of germline mRNAs  
978 and lncRNAs. *Genome Biol* **22**: 1–21.
- 979 Wang W, Ashby R, Ying H, Maleszka R, Forêt S. 2017. Contrasting Sex-and Caste-Dependent piRNA  
980 Profiles in the Transposon Depleted Haplodiploid Honeybee *Apis mellifera*. *Genome Biol Evol* **9**:  
981 1341–1356.
- 982 Weick E-M, Miska EA. 2014. piRNAs: from biogenesis to function. *Development* **141**: 3458–3471.
- 983 Weigelt CM, Hahn O, Arlt K, Gruhn M, Jahn AJ, Eßer J, Werner JA, Klein C, Büschges A, Grönke S, et  
984 al. 2019. Loss of miR-210 leads to progressive retinal degeneration in *Drosophila melanogaster*.  
985 *Life Sci Alliance* **2**: e201800149.
- 986 Winston ML. 1987. *The biology of the honey bee*. Harvard University Press, Cambridge.
- 987 Withrow JM, Tarpay DR. 2018. Cryptic “royal” subfamilies in honey bee (*Apis mellifera*) colonies. *PLoS*  
988 *One* **13**: e0199124.
- 989 Woyke J. 1963. What happens to diploid drone larvae in a honeybee colony. *J Apic Res* **2**: 73–75.
- 990 Wu X, Galbraith DA, Chatterjee P, Jeong H, Grozinger CM, Yi S V. 2020. Lineage and Parent-of-Origin

- 991 Effects in DNA Methylation of Honey Bees (*Apis mellifera*) Revealed by Reciprocal Crosses and  
992 Whole-Genome Bisulfite Sequencing. *Genome Biol Evol* **12**: 1482–1492.
- 993 Yang H, Li M, Hu X, Xin T, Zhang S, Zhao G, Xuan T, Li M. 2016. MicroRNA-dependent roles of Drosha  
994 and Pasha in the *Drosophila* larval ovary morphogenesis. *Dev Biol* **416**: 312–323.
- 995 Zhang P, Kang JY, Gou LT, Wang J, Xue Y, Skogerboe G, Dai P, Huang DW, Chen R, Fu XD, et al. 2015.  
996 MIWI and piRNA-mediated cleavage of messenger RNAs in mouse testes. *Cell Res* **25**: 193–207.
- 997 Zhao F, Cheng L, Shao Q, Chen Z, Lv X, Li J, He L, Sun Y, Ji Q, Lu P, et al. 2020. Characterization of  
998 serum small extracellular vesicles and their small RNA contents across humans, rats, and mice.  
999 *Sci Rep* **10**: 1–16.
- 1000
